# Supplementary material for: Association of Hormonal Contraceptive Use With Adverse Health Outcomes: An Umbrella Review of Meta-analyses of Randomized Clinical Trials and Cohort Studies
Source: PubMed Central journal article supplement (PMC8760614; doi:10.1001/jamanetworkopen.2021.43730), 2022-01-14
Supplement: jamanetwopen-e2143730-s001.pdf [file jamanetwopen-e2143730-s001.pdf]

## Supplementary Online Content

Brabaharan S, Veettil SK, Kaiser JE, et al. Association of hormonal contraceptive use with adverse health outcomes: an umbrella review of meta-analyses of randomized clinical trials and cohort studies. *JAMA Netw Open*. 2022;5(1):e2143730. doi:10.1001/jamanetworkopen.2021.43730

**eTable 1.** Search Strategy

**eTable 2.** Inclusion and Exclusion Criteria

**eTable 3.** Excluded Studies After Applying Inclusion Criteria for Overlapping Meta-analyses

**eTable 4.** Descriptive Characteristics of Included Meta-analyses of RCTs

**eTable 5.** Nonsignificant Associations From Meta-analyses of RCTs

**eTable 6.** Sensitivity Analyses of Meta-analysis of RCTs Initially Graded as High or Moderate

**eTable 7.** Descriptive Characteristics of Included Meta-analyses of Cohort Studies

**eTable 8.** Nonsignificant Associations From Meta-analyses of Cohort Studies

**eTable 9.** Sensitivity and Subgroup Analyses of Meta-analysis of Cohort Studies Initially Graded as Convincing or Highly Suggestive

**eFigure 1.** PRISMA Flow Diagram

**eFigure 2.** Forest Plot of Association Between LNG-IUS and Risk of Endometrial Polyps

**eFigure 3.** Forest Plot of Association Between COC (EE, 30 mcg/CPA) and FBG Levels

**eFigure 4.** Forest Plot of Association Between Past Oral Contraceptive Users and Endometriosis Risk

**eFigure 5.** Forest Plot of Association Between DSG-COC Low Dose and VTE Risk

**eFigure 6.** Schematic Network Diagram of Associations in RCTs (Binary Data)

**eFigure 7.** Schematic Network Diagram of Associations Between COC Users vs Non-COC Users With PCOS in RCTs (Continuous Data)

**eFigure 8.** Schematic Network Diagram of Associations in Cohort Studies

### eReferences

This supplementary material has been provided by the authors to give readers additional information about their work.

**eTable 1.** Search Strategy

**Databases**

- 1) Medline
- 2) Embase
- 3) Cochrane Database of Systematic Review (CDSR)

| No  | Search term                               |
|-----|-------------------------------------------|
|     | <b>CONTRACEPTIVE</b>                      |
| 1)  | exp contraception/                        |
| 2)  | exp postcoital/                           |
| 3)  | exp hormonal contraception/               |
| 4)  | exp long-acting reversible contraception/ |
| 5)  | exp Contraceptives, Oral/                 |
| 6)  | exp Contraceptive Agents, Female/         |
| 7)  | exp contraceptives, oral, sequential/     |
| 8)  | exp contraceptives, postcoital/           |
| 9)  | exp progesterone/                         |
| 10) | exp Hydroxyprogesterones/                 |
| 11) | Hydroxyprogesterone.ti,ab.                |
| 12) | exp 20-alpha-dihydroprogesterone/         |
| 13) | exp desogestrel\$                         |
| 14) | norethindrone\$ Acetate.ti,ab             |
| 15) | (megestrol\$ Acetate or Megestrol).ti,ab. |
| 16) | norethynodrel.ti,ab.                      |
| 17) | exp algestone/                            |
| 18) | algestone\$.ti,ab                         |
| 19) | norprogesterones\$.ti,ab.                 |
| 20) | exp Levonorgestrel/                       |
| 21) | mirena.ti,ab.                             |
| 22) | norethisteron\$.ti,ab.                    |
| 23) | medrogestone\$.ti,ab.                     |
| 24) | exp dydrogesterone/                       |
| 25) | dydrogesterone.ti.ab                      |
| 26) | melengestrol adj2 acetate.ti,ab           |
| 27) | exp desogestrel/                          |
| 28) | desogestrel.ti,ab.                        |

|     |                                                                                               |
|-----|-----------------------------------------------------------------------------------------------|
| 29) | exp norgestrel/                                                                               |
| 30) | norgestrel.ti,ab                                                                              |
| 31) | exp norethindrone/                                                                            |
| 32) | norethindrone\$.ti,ab.                                                                        |
| 33) | progestat\$.ti,ab.                                                                            |
| 34) | medroxyprogest\$ acetate.ti,ab.                                                               |
| 35) | intrauterine adj2 contracep\$.ti,ab                                                           |
| 36) | (levonorgestrel adj2 intrauterine device).ti,ab                                               |
| 37) | nuvaring.ti,ab.                                                                               |
| 38) | ((depo adj2 provera) or depo provera\$.ti,ab.                                                 |
| 39) | (Depo-medroxyprogest\$ or (Depo\$ adj2 medroxyprogest\$)).ti,ab.                              |
| 40) | exp Ethynodiol Diacetate/                                                                     |
| 41) | ethynodiol diacetate.ti,ab.                                                                   |
| 42) | exp Gestonorone Caproate/                                                                     |
| 43) | gestonorone caproate.ti,ab                                                                    |
| 44) | exp lynestrenol/                                                                              |
| 45) | lynestrenol.ti,ab.                                                                            |
| 46) | exp ethylestrenol/                                                                            |
| 47) | ethylestrenol.ti,ab.                                                                          |
| 48) | exp norethandrolone/                                                                          |
| 49) | Norethandrolone.ti,ab.                                                                        |
| 50) | ((progesterone adj2 capsule\$) or (progest\$ adj2 capsule\$)).mp.                             |
| 51) | (progest\$ adj2 implant).ti,ab.                                                               |
| 52) | (implanon\$ or Nexplanon\$ or jabelle\$ or norplant\$ or uniplant\$ or sino-implant\$).ti,ab. |
| 53) | exp contraceptives, oral, combined/                                                           |
| 54) | exp Estrogens/                                                                                |
| 55) | exp "Estrogens, Conjugated (USP)"/                                                            |
| 56) | exp Estradiol/                                                                                |
| 57) | (ethinyl estradiol and norgestrel).ti,ab                                                      |
| 58) | estradiol\$ norgestrel.ti,ab                                                                  |
| 59) | ((ethinyl adj2 estradiol) and norgestimate).ti,ab.                                            |
| 60) | (ethinyl adj2 estradiol and gestodene).ti,ab.                                                 |
| 61) | (chlormadinone acetate and ethinylestradiol).ti,ab.                                           |
| 62) | (chlormadinone acetate and mestranol).ti,ab.                                                  |

|     |                                                             |
|-----|-------------------------------------------------------------|
| 63) | (desogestrel and ethinylestradiol).ti,ab.                   |
| 64) | (dienogest and ethinylestradiol).ti,ab                      |
| 65) | (drospirenone and ethinylestradiol).ti,ab                   |
| 66) | (ethinylestradiol and ethisterone).ti,ab                    |
| 67) | (estradiol cypionate and medroxyprogesterone acetate).ti,ab |
| 68) | (ethinylestradiol and levonorgestrel).ti,ab                 |
| 69) | (ethinylestradiol and megestrol acetate).ti,ab              |
| 70) | (ethinylestradiol and norethisterone).ti,ab                 |
| 71) | (mestranol and norethisterone).ti,ab                        |
| 72) | triphasic contraceptive agent\$.ti,ab.                      |
| 73) | (chlormadinone acetate and dienogest).ti,ab                 |
| 74) | (ethinyl estradiol and cyproterone acetate).ti,ab           |
| 75) | (ethinyl estradiol and drospirenone).ti,ab.                 |

AND

|    | <b>SYSTEMATIC REVIEW AND META ANALYSIS</b> |
|----|--------------------------------------------|
| 1) | exp "Systematic Review"/                   |
| 2) | (systematic adj2 review\$).ti,ab.          |
| 3) | "systematic review".ti,ab.                 |
| 4) | exp Meta-Analysis as Topic/                |
| 5) | exp Meta-Analysis/                         |
| 6) | meta-analys\$.ti,ab.                       |
| 7) | (meta adj1 analys\$).ti,ab.                |

**eTable 2.** Inclusion and Exclusion Criteria

|                                              |                                                                                                                                                                                                                                                                                                                                                                                                                                                                                                                                                                                                                             |
|----------------------------------------------|-----------------------------------------------------------------------------------------------------------------------------------------------------------------------------------------------------------------------------------------------------------------------------------------------------------------------------------------------------------------------------------------------------------------------------------------------------------------------------------------------------------------------------------------------------------------------------------------------------------------------------|
| <b>Selection process</b>                     |                                                                                                                                                                                                                                                                                                                                                                                                                                                                                                                                                                                                                             |
| <b>Review question</b>                       | Is hormonal contraceptive (HC) use associated with adverse health outcomes?<br>How reliable is the evidence behind this association in published meta-analyses?                                                                                                                                                                                                                                                                                                                                                                                                                                                             |
| <b>Objective</b>                             | To conduct an umbrella review of meta-analyses to gain a systematic, comprehensive overview of the existing evidence from meta-analyses of cohort studies and RCTs on HCs use and adverse health outcomes and to assess its strength and validity.                                                                                                                                                                                                                                                                                                                                                                          |
| <b>Inclusion criteria</b>                    | Meta-analyses of cohort studies and meta-analyses of RCTs.<br><br><b>PICO:</b> participants/population: Pre-and post-menopausal women and women of reproductive age prescribed with HC for contraception and treatment: intervention(s), exposure(s): HCs (Oral contraceptives, injectable contraceptives, implants, patches, intravaginal rings, intrauterine system) for any condition at any dose; comparator(s)/control: no limitation will be applied for comparators; outcome: any adverse health outcome associated with exposure to HCs as defined by the original authors.                                         |
| <b>Exclusion criteria</b>                    | We have excluded studies which have assessed non-contraceptive hormones such as tocolytic agents, hormonal replacement therapy for post- menopausal women, appetite stimulant, etc. We excluded 1) meta-analyses of studies with other study designs (e.g., cross-sectional, nested case-control and case-control studies); 2) pooled analyses of a non-systematic selection of observational studies, non-randomized trials and non-systematic reviews; and 3) meta-analyses that provided insufficient or inadequate data for quantitative synthesis.                                                                     |
| <b>Search</b>                                | Search strategy used a combination of terms related to HC, to adverse health outcomes, and to meta-analysis with no limitations to age. Manual searches of the reference list of eligible articles were conducted to identify additional studies that may not have been retrieved through search strategies. No language restriction was applied for the selection process.                                                                                                                                                                                                                                                 |
| <b>Data extraction</b>                       |                                                                                                                                                                                                                                                                                                                                                                                                                                                                                                                                                                                                                             |
| <b>Preliminary data extraction (Phase I)</b> | For each eligible meta-analysis, we extracted the following data independently on to a Microsoft Excel spreadsheet (XP professional edition; Microsoft Corp): first author, year of publication, design, and the number of included studies, specific population under investigation, indication of intervention, the number of cases and participants in each arm, the total number of cases and participants, details of the treatment regimen, the control conditions, the adverse outcome (as defined by authors), the stated summary meta-analytic estimates and their corresponding 95% confidence interval (95% CI). |

|                                                                                |                                                                                                                                                                                                                                                                                                                                                                                                                                                                                                                                                                                                                                                                                                                                                                                                                                                                                                                                                                                                                                                                                                                                                                                                                                                                                                                                                                                                                                                                                                                                                                                                                                                                                                   |
|--------------------------------------------------------------------------------|---------------------------------------------------------------------------------------------------------------------------------------------------------------------------------------------------------------------------------------------------------------------------------------------------------------------------------------------------------------------------------------------------------------------------------------------------------------------------------------------------------------------------------------------------------------------------------------------------------------------------------------------------------------------------------------------------------------------------------------------------------------------------------------------------------------------------------------------------------------------------------------------------------------------------------------------------------------------------------------------------------------------------------------------------------------------------------------------------------------------------------------------------------------------------------------------------------------------------------------------------------------------------------------------------------------------------------------------------------------------------------------------------------------------------------------------------------------------------------------------------------------------------------------------------------------------------------------------------------------------------------------------------------------------------------------------------|
|                                                                                | <p>Based on this information, we generated all possible associations. Then we applied the following criteria to prioritize meta-analysis for each association:</p> <p><b>Selection between overlapping meta-analyses</b> <sup>1-3</sup></p> <p>Association from meta-analyses from the largest data set is selected whenever there is more than one meta-analysis reported the same adverse health outcome.<sup>4-6</sup> An association by meta-analysis with the largest number of primary studies in RCT was prioritised. If more than one published meta-analysis on the same adverse health outcome included an equal number of studies, the one with the largest number of cases will be chosen. If more than one published meta-analysis fulfilled both criteria, the one with more available information on primary studies will be chosen. For meta-analyses of cohort studies, a similar approach was adhered if more than one published meta-analysis on the same outcome was identified.</p>                                                                                                                                                                                                                                                                                                                                                                                                                                                                                                                                                                                                                                                                                          |
| <p><b>Data extraction for evidence synthesis (Phase II data synthesis)</b></p> | <p>Once we have selected a meta-analysis based on the criteria, the following data were extracted independently onto a separate Microsoft Excel spreadsheet (XP professional edition; Microsoft Corp) for cohort studies and RCTs:</p> <p>Meta-analysis level: First author, year of publication, design, and the number of included studies, specific population under investigation, indication of intervention, the number of cases and participants in each arm, total number of cases and participants, details of the treatment regimen, control conditions, follow-up period (mean or median), adverse outcome (as defined by authors), stated summary meta-analytic estimates and their corresponding 95% CI, confounding factors, evidence grading (if reported), and quality score according to AMSTAR 2.</p> <p>Individual study level: First author, year of publication, design (e.g.: retrospective cohort or prospective cohort, the number of cases and participants in each arm, total number of cases and participants, quality assessment (Newcastle-Ottawa Scale (NOS)),<sup>7</sup> if reported, stated summary meta-analytic estimates and their corresponding 95%CI.</p> <p>Meta-analyses investigating several outcomes were recorded separately in the data extraction sheets. We excluded other study designs during this stage. We performed meta-analysis using random-effects models based on the data from only RCTs or cohort studies separately. We presented summary meta-analytic estimates as follow: risk ratio (RR), odds ratio (OR), hazard ratio (HR), standardized mean difference or mean difference (SMD or MD), or weighted mean difference (WMD).</p> |
| <p><b>Quality assessment</b></p>                                               | <p>To grade the methodological quality of each meta-analysis (high, moderate, low, or critically low), we used the revised AMSTAR 2 tool, a 16-item instrument to assess the methodological quality of systematic reviews of randomized and non-randomized studies.<sup>8</sup> The risk of bias (ROB) within each primary study in RCT was assessed using Cochrane Risk of Bias Tool Version 2,<sup>9</sup> whereas risk of bias in primary cohort studies was reported as it was originally stated by the author.</p>                                                                                                                                                                                                                                                                                                                                                                                                                                                                                                                                                                                                                                                                                                                                                                                                                                                                                                                                                                                                                                                                                                                                                                           |

**eTable 3.** Excluded Studies After Applying Inclusion Criteria for Overlapping Meta-analyses

Reason for exclusion of meta-analysis: either not with the largest number of primary cohort studies or the largest number of cases.

| No  | Title of Article                                                                                                                                                                                             | Author (Ref)                      |
|-----|--------------------------------------------------------------------------------------------------------------------------------------------------------------------------------------------------------------|-----------------------------------|
| 1.  | Efficacy and side-effects profile of the ethinylestradiol and etonogestrel contraceptive vaginal ring: a systematic review and meta-analysis. <i>Eur J Contracept Reprod Health Care.</i> 2017;22(2):131–46. | Lopez-Picado A 2017 <sup>10</sup> |
| 2.  | Intrauterine Device Use and Cervical Cancer Risk: A Systematic Review and Meta-analysis. <i>Obstet Gynecol.</i> 2017;130(6):1226–36.                                                                         | Cortessis VK 2017 <sup>11</sup>   |
| 3.  | Is oral contraceptive use associated with an increased risk of cervical cancer? An evidence-based meta-analysis. <i>J Obstet Gynaecol Res.</i> 2017;43(5):913–22.                                            | Peng Y 2017 <sup>12</sup>         |
| 4.  | Is the oral contraceptive or hormone replacement therapy a risk factor for cholelithiasis: A systematic review and meta-analysis. <i>JAMA.</i> 2017;96(14):e6556.                                            | Wang S 2017 <sup>13</sup>         |
| 5.  | A pooled analysis of case-control studies of thyroid cancer. III. Oral contraceptives, menopausal replacement therapy and other female hormones. <i>Cancer Causes Control.</i> 1999;10(2):157–66.            | La Vecchia C 1999 <sup>14</sup>   |
| 6.  | Do oral contraceptive agents affect the risk of breast cancer? A meta-analysis of the case-control reports. <i>J Am Board Fam Pract.</i> 1993;6(2):123–35.                                                   | Hawley W 1992 <sup>15</sup>       |
| 7.  | Contraception and the risk of ectopic pregnancy: A meta-analysis. <i>Contraception.</i> 1995 Dec 1;52(6):337–41.                                                                                             | Mol BWJ 1995 <sup>16</sup>        |
| 8.  | Oral contraceptives and breast cancer. Review and meta-analysis. <i>Cancer.</i> 1990;66(11):2253–63.                                                                                                         | Romieu I 1990 <sup>17</sup>       |
| 9.  | Oral contraceptives and the risk of rheumatoid arthritis: a meta-analysis of a conflicting literature. <i>Br J Rheumatol.</i> 1989;28 Suppl 1(b1t, 8302415):13–23.                                           | Romieu I 1989 <sup>18</sup>       |
| 10. | Oral contraceptives and venous thromboembolism: a quantitative discussion of the uncertainties. <i>J Intern Med.</i> 1995;238(1):31–7                                                                        | Koster T 1995 <sup>19</sup>       |

|     |                                                                                                                                                                                                              |                                  |
|-----|--------------------------------------------------------------------------------------------------------------------------------------------------------------------------------------------------------------|----------------------------------|
| 11. | The protective effect of the oral contraceptive pill on rheumatoid arthritis: an overview of the analytic epidemiological studies using meta-analysis. <i>J Clin Epidemiol.</i> 1990;43(11):1221–30.         | Spector TD 1990 <sup>20</sup>    |
| 12. | A pooled analysis of 10 case-control studies of melanoma and oral contraceptive use. <i>Br J Cancer.</i> 2002;86(7):1085–92.                                                                                 | Karagas MR 2002 <sup>21</sup>    |
| 13. | Oral contraceptives and colorectal cancer risk: a meta-analysis. <i>Br J Cancer.</i> 2001;84(5):722–7.                                                                                                       | Fernandez E 2001 <sup>22</sup>   |
| 14. | Risk of venous thromboembolism from oral contraceptives containing gestodene and desogestrel versus levonorgestrel: a meta-analysis and formal sensitivity analysis. <i>Contraception.</i> 2001;64(2):125–33 | Hennessy S 2001 <sup>23</sup>    |
| 15. | Oral contraceptive use and breast cancer risk: a meta-analysis of variations with age at diagnosis, parity and total duration of oral contraceptive use. <i>Br J Obstet Gynaecol.</i> 1992;99(3):239–46.     | Rushton L 1992 <sup>24</sup>     |
| 16. | Hormonal contraceptives and cerebral venous thrombosis risk: a systematic review and meta-analysis. <i>Front Neurol.</i> 2015;6(101546899):7                                                                 | Amoozegar F 2015 <sup>25</sup>   |
| 17. | Oral contraceptives and risk of ovarian and breast cancers in BRCA mutation carriers: a meta-analysis. <i>Expert Rev Anticancer Ther</i> 2011;11(8):1197–1207.                                               | Cibula D 2011 <sup>26</sup>      |
| 18. | Depot medroxyprogesterone acetate and breast cancer. A pooled analysis of the World Health Organization and New Zealand studies. <i>JAMA.</i> 1995;273(10):799–804.                                          | Skegg DC 1995 <sup>27</sup>      |
| 19. | Association between the current use of low-dose oral contraceptives and cardiovascular arterial disease: a meta-analysis. <i>J Clin Endocrinol Metab.</i> 2005;90(7):3863–70.                                | Baillargeon-J 2005 <sup>28</sup> |
| 20. | Combination injectable contraceptives for contraception. <i>Cochrane Database Syst Rev.</i> 2005;(3):CD004568.                                                                                               | Gallo MF 2005 <sup>29</sup>      |
| 21. | Thrombophilic abnormalities, oral contraceptives, and risk of cerebral vein thrombosis: a meta-analysis. <i>Blood.</i> 2006;107(7):2766–73.                                                                  | Dentali F 2006 <sup>30</sup>     |



|     |                                                                                                                                                                                    |                                 |
|-----|------------------------------------------------------------------------------------------------------------------------------------------------------------------------------------|---------------------------------|
| 22  | Oral contraceptive use as a risk factor for premenopausal breast cancer: a meta-analysis. <i>Mayo Clin Proc.</i> 2006;81(10):1290–302.                                             | Kahlenborn C 2006 <sup>31</sup> |
| 23  | Oral contraceptives containing drospirenone for premenstrual syndrome. <i>Cochrane Database Syst Rev.</i> 2012;(2):CD006586.                                                       | Lopez LM 2012 <sup>32</sup>     |
| 24. | The risk of oral contraceptives in the etiology of inflammatory bowel disease: a meta-analysis. <i>Am J Gastroenterol.</i> 2008;103(9):2394–400.                                   | Cornish JA 2008 <sup>33</sup>   |
| 25. | Progestogen-only contraceptives and the risk of stroke: a meta-analysis. <i>Stroke.</i> 2009;40(4):1059–62.                                                                        | Chakhtoura Z 2009 <sup>34</sup> |
| 26. | Oral contraceptive use and breast or ovarian cancer risk in BRCA1/2 carriers: a meta-analysis. <i>Eur J Cancer.</i> 2010;46(12):2275–84                                            | Iodice S 2010 <sup>35</sup>     |
| 27. | Progestogen-only contraceptives and the risk of acute myocardial infarction: a meta-analysis. <i>J Clin Endocrinol Metab.</i> 2011;96(4):1169–74.                                  | Chakhtoura Z 2011 <sup>36</sup> |
| 29. | Oral contraceptives and venous thromboembolism: a systematic review and meta-analysis. <i>Drug Saf.</i> 2012;35(3):191–205.                                                        | Manzoli L 2012 <sup>37</sup>    |
| 29. | Types of progestogens in combined oral contraception: effectiveness and side-effects. <i>Cochrane Database Syst Rev.</i> 2011;(5):CD004861.                                        | Lawrie TA 2011 <sup>38</sup>    |
| 30. | Different combined oral contraceptives and the risk of venous thrombosis: systematic review and network meta-analysis. <i>BMJ [Internet].</i> 2013 Sep 12 [cited 2020 Jul 26];347. | Stegeman BH 2013 <sup>39</sup>  |
| 31. | Long-term effects of levonorgestrel-releasing intrauterine system on tamoxifen-treated breast cancer patients: a meta-analysis. <i>Int J Clin Exp Pathol.</i> 2014;7(10):6419–29.  | Fu Y 2014 <sup>40</sup>         |
| 32. | The Role of Oral Contraceptive Pills on Increased Risk of Breast Cancer in Iranian Populations: A Meta-analysis. <i>J cancer prev.</i> 2016;21(4):294–301.                         | Soroush A 2016 <sup>41</sup>    |
| 33. | Association between oral contraceptive use as a risk factor and triple-negative breast cancer: A systematic review and meta-analysis. <i>Mol clin oncol.</i> 2017;7(1):76–80.      | Li L 2017 <sup>42</sup>         |

|     |                                                                                                                                                                                                                               |                                       |
|-----|-------------------------------------------------------------------------------------------------------------------------------------------------------------------------------------------------------------------------------|---------------------------------------|
| 34. | Combined oral contraceptives, thrombophilia and the risk of venous thromboembolism: a systematic review and meta-analysis. <i>J Thromb Haemost.</i> 2016;14(7):1393–403.                                                      | Van Vlijmen 2016 <sup>43</sup>        |
| 35. | Effect of age at first use of oral contraceptives on breast cancer risk: An updated meta-analysis. <i>Medicine (Baltimore).</i> 2019;98(36):e15719.                                                                           | Ji LW 2019 <sup>44</sup>              |
| 36. | Efficacy of levonorgestrel releasing intrauterine system as a postoperative maintenance therapy of endometriosis: A meta-analysis. <i>Eur J Obstet Gynecol Reprod Biol.</i> 2018;231(e41, 0375672):85–92.                     | Song SY 2018 <sup>45</sup>            |
| 37. | Combined oral contraceptives: the risk of myocardial infarction and ischemic stroke. <i>Cochrane Database Syst Rev.</i> 2015 Aug 27;(8):CD011054.                                                                             | Roach REJ 2015 <sup>46</sup>          |
| 38. | Safety of hormonal replacement therapy and oral contraceptives in systemic lupus erythematosus: a systematic review and meta-analysis. <i>PLoS ONE.</i> 2014;9(8):e104303.                                                    | Rojas Villarraga A 2014 <sup>47</sup> |
| 39. | The effectiveness of metformin, oral contraceptives, and lifestyle modification in improving the metabolism of overweight women with polycystic ovary syndrome: a network meta-analysis. <i>Endocrine.</i> 2019;64(2):220–32. | Wang A 2019 <sup>48</sup>             |
| 40. | Second- and third-generation oral contraceptives and myocardial infarction: Systematic review and meta-analysis. <i>Clin Invest Ginecol Obstet.</i> 2016;43(4):174–8.                                                         | Rojas RF 2016 <sup>49</sup>           |
| 41. | A Systematic Review and Meta-analysis of the Adverse Effects of Levonorgestrel Emergency Oral Contraceptive. <i>Clin Drug Invest.</i> 2020;40(5):395–420.                                                                     | Leelakanok N 2020 <sup>50</sup>       |
| 42. | Modifiers of cancer risk in BRCA1 and BRCA2 mutation carriers: systematic review and meta-analysis. <i>J Natl Cancer Inst;</i> 2014. 106(6):dju091                                                                            | Friebel TM 2014 <sup>51</sup>         |
| 43. | Meta-analysis of oral contraceptive use and risks of all-cause and cause-specific death. <i>Int J Gynaecol Obstet.</i> 2015;131(3):228–33.                                                                                    | Zhong G-C 2015 <sup>52</sup>          |

|     |                                                                                                                                                                           |                            |
|-----|---------------------------------------------------------------------------------------------------------------------------------------------------------------------------|----------------------------|
| 44. | The effects of Diane-35 and metformin in treatment of polycystic ovary syndrome: An updated systematic review. <i>Gynaecological Endocrinology</i> . 2008;24(10);590-600. | Zhang J 2008 <sup>53</sup> |
|-----|---------------------------------------------------------------------------------------------------------------------------------------------------------------------------|----------------------------|

**eTable 4.** Descriptive Characteristics of Included Meta-analyses of RCTs

| Source                         | Adverse health outcome    | Population                                                                 | Exposed/Unexposed                       | No of studies | Exposed Cases/total number | Unexposed Cases/total number | Length of follow-up | AMSTAR-2 quality |
|--------------------------------|---------------------------|----------------------------------------------------------------------------|-----------------------------------------|---------------|----------------------------|------------------------------|---------------------|------------------|
| <b>Significant association</b> |                           |                                                                            |                                         |               |                            |                              |                     |                  |
| Lethaby A <sup>54</sup>        | Weight gain               | Women at reproductive age with regular heavy menstrual                     | LNG-IUS/Non-user                        | 2             | 18/70                      | 7/71                         | 12 months           | High             |
| Chin J <sup>55</sup>           | Endometrial polyps        | Post/pre + post-menopausal women with adjuvant tamoxifen for breast cancer | LNG-IUS/Non-users                       | 2             | 2/113                      | 13/110                       | 1 year              | High             |
| Chin J <sup>55</sup>           | Endometrial polyps        | Post/pre + post-menopausal women with adjuvant tamoxifen for breast cancer | LNG-IUS/Non-users                       | 4             | 10/206                     | 48/211                       | 2-5 years           | High             |
| Amiri M <sup>56</sup>          | Fasting insulin 12 months | Women of reproductive age with PCOS                                        | COC (EE 30 mcg + DSG 150 mcg)/Non-users | 2             | NA                         | NA                           | 12 months           | Low              |
| Amiri M <sup>56</sup>          | FBG 6 months              | Women of reproductive age with PCOS                                        | COC (EE 30 mcg + DRSP 3 mg)/Non-users   | 4             | NA                         | NA                           | 6 months            | Low              |
| Amiri M <sup>56</sup>          | FBG 6 months              | Women of reproductive age with PCOS                                        | COC (EE 35 mcg + CPA 2 mg) /Non-users   | 5             | NA                         | NA                           | 6 months            | Low              |
| Amiri M <sup>56</sup>          | HOMA IR 3 months          | Women of reproductive age with PCOS                                        | COC (EE 35 mcg + CPA 2 mg) /Non-users   | 2             | NA                         | NA                           | 3 months            | Low              |
| Ralph L <sup>(58)</sup>        | HIV risk                  | Sub Saharan African women aged 16-50 years                                 | DMPA/Non-HC user                        | 4             | NA/5336                    | NA/9737                      | 2-2.8 years         | Low              |

|                                    |              |                                         |                                 |   |        |       |            |      |
|------------------------------------|--------------|-----------------------------------------|---------------------------------|---|--------|-------|------------|------|
| Amiri M <sup>56</sup>              | TC           | Women of reproductive age with PCOS     | EE 35 mcg + CPA 2 mg/Non-users  | 2 | NA     | NA    | 6 months   | Low  |
| Amiri M <sup>56</sup>              | TC           | Women of reproductive age with PCOS     | EE 35 mcg + CPA 2 mg/Non-users  | 2 | NA     | NA    | 12 months  | Low  |
| Amiri M <sup>56</sup>              | LDL-C        | Women of reproductive age with PCOS     | EE 35 mcg + CPA 2 mg/Non-users  | 2 | NA     | NA    | 12 months  | Low  |
| Amiri M <sup>56</sup>              | HDL-C        | Women of reproductive age with PCOS     | EE 35 mcg + CPA 2 mg/Non-users  | 2 | NA     | NA    | 12 months  | Low  |
| Amiri M <sup>56</sup>              | LDL-C        | Women of reproductive age with PCOS     | EE 35mcg + DRSP 3 mg/Non-users  | 2 | NA     | NA    | 12 months  | Low  |
| Amiri M <sup>56</sup>              | HDL-C        | Women of reproductive age with PCOS     | EE 35mcg + DRSP 3 mg/Non-users  | 2 | NA     | NA    | 6 months   | Low  |
| Lethaby A <sup>54</sup>            | Ovarian cyst | Women of reproductive age >18 years old | LNG-IUS/Other medical treatment | 3 | 17/390 | 5/394 | 3-10 years | High |
| <b>Non-Significant association</b> |              |                                         |                                 |   |        |       |            |      |
| Amiri M <sup>56</sup>              | BMI change   | Women of reproductive age with PCOS     | EE 35 mcg + CPA 2 mg/Non-users  | 5 | NA     | NA    | 3 months   | Low  |
| Amiri M <sup>56</sup>              | BMI change   | Women of reproductive age with PCOS     | EE 35 mcg + CPA 2 mg/Non-users  | 5 | NA     | NA    | 6 months   | Low  |
| Amiri M <sup>56</sup>              | BMI change   | Women of reproductive age with PCOS     | EE 35 mcg + CPA 2 mg/Non-users  | 3 | NA     | NA    | 12 months  | Low  |
| Amiri M <sup>56</sup>              | BMI change   | Women of reproductive age with PCOS     | EE 35 mcg + DRSP 3 mg/Non-users | 3 | NA     | NA    | 6 months   | Low  |

|                        |                      |                                                                            |                                                                          |   |        |        |              |                |
|------------------------|----------------------|----------------------------------------------------------------------------|--------------------------------------------------------------------------|---|--------|--------|--------------|----------------|
| Amiri M <sup>56</sup>  | BMI change           | Women of reproductive age with PCOS                                        | EE 35 mcg + DRSP 3 mg/Non-users                                          | 3 | NA     | NA     | 12 months    | Low            |
| Lopez LM <sup>57</sup> | Weight gain          | Women at reproductive age >18 years                                        | Vaginal ring etonogestrel 120 mcg/EE 15 mcg/ COC (LNG 150 mcg-EE 30 mcg) | 2 | 11/544 | 12/588 | 11-13 months | High           |
| Draper <sup>58</sup>   | Weight gain          | Women at reproductive age                                                  | DMPA/NET-EN                                                              | 2 | NA/871 | NA/492 | 12 months    | High           |
| Gallo MF <sup>59</sup> | Depression           | Women aged 18-39 years                                                     | EE 20 mcg + GSD 75 mcg/ EE 30 mcg + GSD 75 mcg                           | 2 | 14/459 | 4/258  | 12-13 months | High           |
| French R <sup>60</sup> | Ectopic pregnancy    | Women aged 18-40 years                                                     | LNG-IUS 20/Non-hormonal IUD                                              | 2 | 1/1985 | 1/1094 | 1 year       | High           |
| French R <sup>60</sup> | Ectopic pregnancy    | Women of reproductive age and mixed parity                                 | Progestasert®                                                            | 2 | 3/358  | 0/350  | 1 year       | High           |
| Chin J <sup>55</sup>   | Endometrial fibroids | Post/pre + post-menopausal women with adjuvant tamoxifen for breast cancer | LNG-IUS/Non-users                                                        | 3 | 4/152  | 9/162  | 1-2 years    | High           |
| Lopez LM <sup>61</sup> | FBG at cycle 6       | Reproductive aged women without diabetes                                   | EE 30/DSG/EE 30/GSD                                                      | 2 | NA/25  | NA/32  | 6 months     | Critically low |
| Lopez LM <sup>61</sup> | FBG at cycle 6       | Reproductive aged women without diabetes                                   | EE 30/DSG/ EE 30/LNG                                                     | 2 | NA/33  | NA/39  | 6 months     | Critically low |
| Lopez LM <sup>61</sup> | FBG at cycle 6       | Reproductive aged women without diabetes                                   | EE 35/Norethindrone/ EE 30-40/LNG                                        | 2 | NA/72  | NA/72  | 6 months     | Critically low |
| Lopez LM <sup>61</sup> | FBG at cycle 12      | Reproductive aged women without diabetes                                   | EE 30/DSG/ EE 30/LNG                                                     | 2 | NA/27  | NA/35  | 12 months    | Critically low |

|                        |                                     |                                            |                                          |   |         |         |             |                |
|------------------------|-------------------------------------|--------------------------------------------|------------------------------------------|---|---------|---------|-------------|----------------|
| Lopez LM <sup>61</sup> | Glucose area under curve at cycle 6 | Reproductive aged women without diabetes   | EE 35/Norethindrone/ EE 30-40/LNG        | 2 | NA/72   | NA/72   | 6 months    | Critically low |
| Amiri M <sup>56</sup>  | FBG 6 months                        | Women with PCOS                            | OC/Non-users                             | 2 | NA      | NA      | 3-24 months | Low            |
| Amiri M <sup>56</sup>  | FBG 12 months                       | Women with PCOS                            | COC (EE 30 mcg + DSG 150 mcg)/Non-users  | 2 | NA      | NA      | 12 months   | Low            |
| Amiri M <sup>56</sup>  | Fasting insulin 6 months            | Women with PCOS                            | COC (EE 30 mcg + DSG 150 mcg)/Non-users  | 2 | NA      | NA      | 6 months    | Low            |
| Amiri M <sup>56</sup>  | HOMA-IR                             | Women with PCOS                            | COC (EE 30 mcg + DSG 150 mcg)/Non-users  | 2 | NA      | NA      | 6 months    | Low            |
| Amiri M <sup>56</sup>  | HOMA-IR                             | Women with PCOS                            | COC (EE 30 mcg + DSG 150 mcg) /Non-users | 2 | NA      | NA      | 12 months   | Low            |
| Amiri M <sup>56</sup>  | HOMA-IR                             | Women with PCOS                            | COC (EE 35 mcg + DRSP 3 mg) /Non-users   | 5 | NA      | NA      | 6 months    | Low            |
| Amiri M <sup>56</sup>  | HOMA-IR                             | Women with PCOS                            | COC (EE 35 mcg + DRSP 3 mg) /Non-users   | 2 | NA      | NA      | 12 months   | Low            |
| Amiri M <sup>56</sup>  | Fasting insulin                     | Women with PCOS                            | COC (EE 35 mcg + CPA 2 mg) /Non-users    | 4 | NA      | NA      | 3 months    | Low            |
| Amiri M <sup>56</sup>  | Fasting insulin                     | Women with PCOS                            | COC (EE 35 mcg + CPA 2 mg) /Non-users    | 4 | NA      | NA      | 6 months    | Low            |
| Amiri M <sup>56</sup>  | Fasting insulin                     | Women with PCOS                            | COC (EE 35 mcg + CPA 2 mg) /Non-users    | 2 | NA      | NA      | 12 months   | Low            |
| Amiri M <sup>56</sup>  | HOMA-IR                             | Women with PCOS                            | COC (EE 35 mcg + CPA 2 mg) /Non-users    | 3 | NA      | NA      | 6 months    | Low            |
| Amiri M <sup>56</sup>  | HOMA-IR                             | Women with PCOS                            | COC (EE 35 mcg + CPA 2 mg) /Non-users    | 2 | NA      | NA      | 12 months   | Low            |
| Ralph L <sup>62</sup>  | HIV risk                            | Sub Saharan African women aged 16-50 years | COC/Non-HC user                          | 4 | NA/3262 | NA/9737 | 1-2 years   | Low            |

|                           |          |                                            |                                        |   |         |          |             |      |
|---------------------------|----------|--------------------------------------------|----------------------------------------|---|---------|----------|-------------|------|
| Ralph L <sup>62</sup>     | HIV risk | Sub Saharan African women aged 16-50 years | NET-EN (injection)/Non-HC user         | 2 | 86/1390 | 225/5457 | 1 year      | Low  |
| Morrison CS <sup>63</sup> | HIV risk | Sub Saharan African women aged 16-50 years | DMPA/COC user                          | 3 | NA/1462 | NA/2023  | 2-2.8 years | Low  |
| Amiri M <sup>56</sup>     | SBP      | Women at reproductive age with PCOS        | COC (EE 35 mcg + DRSP 3 mg) /Non-users | 2 | NA      | NA       | 6 months    | Low  |
| Amiri M <sup>56</sup>     | DBP      | Women at reproductive age with PCOS        | COC (EE 35 mcg + DRSP 3 mg) /Non-users | 2 | NA      | NA       | 6 months    | Low  |
| Amiri M <sup>56</sup>     | SBP      | Women at reproductive age with PCOS        | COC (EE 35 mcg + DRSP 3 mg) /Non-users | 2 | NA      | NA       | 12 months   | Low  |
| Amiri M <sup>56</sup>     | DBP      | Women at reproductive age with PCOS        | COC (EE 35 mcg + DRSP 3 mg) /Non-users | 2 | NA      | NA       | 12 months   | Low  |
| Draper <sup>58</sup>      | SBP      | Women at reproductive age                  | DMPA/NET-EN                            | 2 | NA/871  | NA/492   | 1-2 years   | High |
| Draper <sup>58</sup>      | DBP      | Women at reproductive age                  | DMPA/NET-EN                            | 2 | NA/871  | NA/492   | 1-2 years   | High |
| Amiri M <sup>56</sup>     | LDL-C    | Women with PCOS                            | COC (EE 30 mcg+ DSG 150 mcg)/Non-users | 2 | NA      | NA       | 6 months    | Low  |
| Amiri M <sup>56</sup>     | TG       | Women with PCOS                            | COC (EE 35 mcg + CPA 2 mg)/Non-users   | 3 | NA      | NA       | 3 months    | Low  |
| Amiri M <sup>56</sup>     | TG       | Women with PCOS                            | COC (EE 35 mcg + CPA 2 mg)/Non-users   | 2 | NA      | NA       | 6 months    | Low  |
| Amiri M <sup>56</sup>     | TC       | Women with PCOS                            | COC (EE 35 mcg + CPA 2 mg)/Non-users   | 4 | NA      | NA       | 3 months    | Low  |
| Amiri M <sup>56</sup>     | LDL-C    | Women with PCOS                            | COC (EE 35 mcg + CPA 2 mg)/Non-users   | 4 | NA      | NA       | 3 months    | Low  |
| Amiri M <sup>56</sup>     | LDL-C    | Women with PCOS                            | COC (EE 35 mcg + CPA 2 mg)/Non-users   | 3 | NA      | NA       | 6 months    | Low  |



|                       |       |                 |                                       |   |    |    |           |     |
|-----------------------|-------|-----------------|---------------------------------------|---|----|----|-----------|-----|
| Amiri M <sup>56</sup> | HDL-C | Women with PCOS | COC (EE 30 mcg + CPA 2 mg)/Non-users  | 4 | NA | NA | 3 months  | Low |
| Amiri M <sup>56</sup> | LDL-C | Women with PCOS | COC (EE 30 mcg + DRSP 3 mg)/Non-users | 3 | NA | NA | 6 months  | Low |
| Amiri M <sup>56</sup> | HDL-C | Women with PCOS | COC (EE 30 mcg + DRSP 3 mg)/Non-users | 2 | NA | NA | 12 months | Low |

**eTable 5.** Nonsignificant Associations From Meta-analyses of RCTs

| Source                      | Health outcome  | Population                          | Intervention (I)                            | Comparison (C)              | Follow up (range) | No. of studies | Total no of participants | Metric | ES (95% CI)                         | P Value | GRADE evidence (Not serious (NS), serious (S), very serious (VS)) |                |              |             |                                  | AMSTAR 2 |                               |
|-----------------------------|-----------------|-------------------------------------|---------------------------------------------|-----------------------------|-------------------|----------------|--------------------------|--------|-------------------------------------|---------|-------------------------------------------------------------------|----------------|--------------|-------------|----------------------------------|----------|-------------------------------|
|                             |                 |                                     |                                             |                             |                   |                |                          |        |                                     |         | ROB                                                               | I2/inconstancy | Indirectness | Imprecision | Egger's p-value/publication bias |          | Overall certainty of evidence |
| Amiri M 2017 <sup>56</sup>  | BMI change      | Women of reproductive age with PCOS | EE 35 mcg + CPA 2 mg                        | Non-users                   | 3 months          | 5              | 81                       | MD     | 0.17 (-0.47 to 0.82) <sup>UA</sup>  | 0.60    | S                                                                 | NS             | NS           | NS          | 0.24/No                          | Moderate | Low                           |
| Amiri M 2017 <sup>56</sup>  | BMI change      | Women of reproductive age with PCOS | EE 35 mcg + CPA 2 mg                        | Non-users                   | 6 months          | 5              | 132                      | MD     | -0.28 (-1.13 to 0.57) <sup>UA</sup> | 0.52    | S                                                                 | VS             | NS           | S           | 0.43/No                          | Very low | Low                           |
| Amiri M 2017 <sup>56</sup>  | BMI change      | Women of reproductive age with PCOS | EE 35 mcg + CPA 2 mg                        | Non-users                   | 12 months         | 3              | 75                       | MD     | -0.63 (-1.60 to 0.34) <sup>UA</sup> | 0.20    | S                                                                 | NS             | NS           | S           | NA                               | Low      | Low                           |
| Amiri M 2017 <sup>56</sup>  | BMI change      | Women of reproductive age with PCOS | EE 35 mcg + DRSP 3 mg                       | Non-users                   | 6 months          | 3              | 163                      | MD     | -0.18 (-0.87 to 0.51) <sup>UA</sup> | 0.61    | S                                                                 | VS             | NS           | S           | 0.61/No                          | Very low | Low                           |
| Amiri M 2017 <sup>56</sup>  | BMI change      | Women of reproductive age with PCOS | EE 35 mcg + DRSP 3 mg                       | Non-users                   | 12 months         | 3              | 136                      | MD     | -1.94 (-4.23 to 0.36) <sup>UA</sup> | 0.10    | S                                                                 | VS             | NS           | S           | 0.92/No                          | Very low | Low                           |
| Lopez LM 2008 <sup>61</sup> | Weight increase | Women at reproductive age >18 years | Vaginal ring etonogestrel 120 mcg/EE 15 mcg | COC (LNG 150 mcg/EE 30 mcg) | 11-13 months      | 2              | 1132                     | RR     | 1.70 (0.19-15.48) <sup>NR</sup>     | 0.64    | NS                                                                | S              | S            | VS          | NA                               | Very low | High                          |
| Draper 2006 <sup>58</sup>   | Weight gain     | Women at reproductive age           | DMPA                                        | NET-EN                      | 12 months         | 2              | 1363                     | MD     | 0.37 (-0.33 to 1.07) <sup>NR</sup>  | 0.30    | NS                                                                | NS             | NS           | S           | NA                               | Moderate | High                          |
| Gallo MF 2013 <sup>64</sup> | Depression      | Women aged 18-39 years              | EE 20mcg + GSD 75 mcg                       | EE 30 mcg + GSD 75 mcg      | 12-13 months      | 2              | 717                      | OR     | 2.12 (0.80-5.66) <sup>UA</sup>      | 0.13    | S                                                                 | NS             | NS           | S           | NA                               | Low      | High                          |

|                             |                        |                                                                         |                                    |                          |           |   |      |    |                                       |      |    |    |    |    |         |          |                |
|-----------------------------|------------------------|-------------------------------------------------------------------------|------------------------------------|--------------------------|-----------|---|------|----|---------------------------------------|------|----|----|----|----|---------|----------|----------------|
| French R 2001 <sup>60</sup> | Ectopic pregnancy      | Women aged 18-40 years                                                  | LNG-IUS 20 (Mirena®)               | Nova-T IUD®              | 1 year    | 2 | 3079 | RR | 0.70 (0.04-11.12) <sup>NR</sup>       | 0.80 | S  | NS | NS | S  | NA      | Low      | High           |
| French R 2001 <sup>60</sup> | Ectopic pregnancy      | Mixed parity                                                            | Progestasert®                      | Non hormonal IUD         | 1 year    | 2 | 708  | RR | 3.85 (0.43-34.7) <sup>NR</sup>        | 0.23 | S  | NS | S  | VS | NA      | Very low | High           |
| Chin J 2009 <sup>55</sup>   | Endometrial fibroids   | Post/pre+postmenopausal women with adjuvant tamoxifen for breast cancer | LNG-IUS + Endometrial surveillance | Endometrial surveillance | 1-2 years | 3 | 314  | OR | 0.48 (0.16-1.48) <sup>NR</sup>        | 0.20 | NS | NS | S  | S  | 0.83/No | Moderate | High           |
| Lopez LM 2014 <sup>61</sup> | FBG at cycle 6         | Reproductive aged women without diabetes                                | EE 30/DSG                          | EE 30/GSD                | 6 months  | 2 | 57   | MD | 0.34 (-3.99 to 4.67) <sup>NR</sup>    | 0.88 | NS | NS | S  | S  | NA      | Low      | Critically low |
| Lopez LM 2014 <sup>61</sup> | FBG at cycle 6         | Reproductive aged women without diabetes                                | EE 30/DSG                          | EE 30/LNG                | 6 months  | 2 | 72   | MD | 0.20 (0-0.41) <sup>NR</sup>           | 0.05 | VS | NS | S  | NS | NA      | Very low | Critically low |
| Lopez LM 2014 <sup>61</sup> | FBG at cycle 6         | Reproductive aged women without diabetes                                | EE 35/Norethindrone                | EE 30-40/LNG             | 6 months  | 2 | 144  | MD | -0.88 (-2.83 to 1.06) <sup>NR</sup>   | 0.37 | S  | NS | S  | NS | NA      | Low      | Critically low |
| Lopez LM 2014 <sup>61</sup> | FBG at cycle 12        | Reproductive aged women without diabetes                                | EE 30/DSG                          | EE 30/LNG                | 12 months | 2 | 62   | MD | 0.15 (-0.08 to 0.38) <sup>NR</sup>    | 0.20 | VS | NS | S  | NS | NA      | Very low | Critically low |
| Lopez LM 2014 <sup>61</sup> | Glucose AUC at cycle 6 | Reproductive aged women without diabetes                                | EE 35/Norethindrone                | EE 30-40/LNG             | 6 months  | 2 | 144  | MD | -10.83 (-29.62 to 7.96) <sup>NR</sup> | 0.26 | S  | NS | S  | VS | NA      | Very low | Critically low |

|                            |                             |                 |                               |           |             |   |     |    |                        |      |    |    |    |    |         |           |     |
|----------------------------|-----------------------------|-----------------|-------------------------------|-----------|-------------|---|-----|----|------------------------|------|----|----|----|----|---------|-----------|-----|
| Amiri M 2017 <sup>56</sup> | FBG 6 mont hs               | Women with PCOS | OC users                      | Non-users | 3-24 months | 2 | 88  | MD | -0.93 (-3.73 to 1.86)  | 0.51 | S  | S  | NS | S  | NA      | NA        | Low |
| Amiri M 2017 <sup>56</sup> | FBG 12 mont hs              | Women with PCOS | COC (EE 30 mcg + DSG 150 mcg) | Non-users | 12 months   | 2 | 76  | MD | -1.23 (-9.46 to 11.92) | 0.82 | S  | VS | NS | VS | NA      | Very low  | Low |
| Amiri M 2017 <sup>56</sup> | Fastin g insuli n 6 mont hs | Women with PCOS | COC (EE 30 mcg + DSG 150 mcg) | Non-users | 6 months    | 2 | 88  | MD | 0.80 (-1.42 to 3.03)   | 0.48 | S  | NS | NS | S  | NA      | Low       | Low |
| Amiri M 2017 <sup>56</sup> | HOM A-IR                    | Women with PCOS | COC (EE 30 mcg + DSG 150 mcg) | Non-users | 6 months    | 2 | 88  | MD | 0.08 (-0.41 to 0.57)   | 0.74 | S  | NS | NS | S  | NA      | Low       | Low |
| Amiri M 2017 <sup>56</sup> | HOM A-IR                    | Women with PCOS | COC (EE 30 mcg + DSG 150 mcg) | Non-users | 12 months   | 2 | 76  | MD | 0.40 (-0.67 to 1.46)   | 0.47 | S  | VS | NS | S  | NA      | Very low  | Low |
| Amiri M 2017 <sup>56</sup> | HOM A-IR                    | Women with PCOS | COC (EE 35 mcg + DRSP 3 mg)   | Non-users | 6 months    | 5 | 193 | MD | -0.23 (-0.57 to 0.11)  | 0.19 | S  | S  | NS | S  | 0.63/No | Very low  | Low |
| Amiri M 2017 <sup>56</sup> | HOM A-IR                    | Women with PCOS | COC (EE 35 mcg + DRSP 3 mg)   | Non-users | 12 months   | 2 | 116 | MD | -0.09 (-0.83 to 0.65)  | 0.82 | S  | S  | NS | S  | NA      | Very low  | Low |
| Amiri M 2017 <sup>56</sup> | Fastin g insuli n           | Women with PCOS | COC (EE 35 mcg + CPA 2 mg)    | Non-users | 3 months    | 4 | 81  | MD | -1.29 (-3.31 to 0.73)  | 0.21 | S  | S  | NS | S  | 0.88/No | Very low  | Low |
| Amiri M 2017 <sup>56</sup> | Fastin g insuli n           | Women with PCOS | COC (EE 35 mcg + CPA 2 mg)    | Non-users | 6 months    | 4 | 106 | MD | 1.35 (-0.38 to 3.08)   | 0.13 | NS | NS | NS | S  | 0.46/No | Mode rate | Low |
| Amiri M 2017 <sup>56</sup> | Fastin g insuli n           | Women with PCOS | COC (EE 35 mcg + CPA 2 mg)    | Non-users | 12 months   | 2 | 74  | MD | 3.00 (-3.19 to 9.19)   | 0.34 | S  | VS | NS | S  | NA      | Very low  | Low |
| Amiri M 2017 <sup>56</sup> | HOM A-IR                    | Women with PCOS | COC (EE 35 mcg + CPA 2 mg)    | Non-users | 6 months    | 3 | 97  | MD | 0.41 (-0.31 to 1.13)   | 0.27 | NS | NS | NS | S  | 0.95/No | Mode rate | Low |

|                            |          |                                            |                              |             |           |   |       |    |                         |      |    |    |    |    |          |           |     |
|----------------------------|----------|--------------------------------------------|------------------------------|-------------|-----------|---|-------|----|-------------------------|------|----|----|----|----|----------|-----------|-----|
| Amiri M 2017 <sup>56</sup> | HOM A-IR | Women with PCOS                            | COC (EE 35 mcg + CPA 2 mg)   | Non-users   | 12 months | 2 | 74    | MD | 0.70 (-0.30 to 1.70)    | 0.17 | S  | VS | NS | S  | NA       | Very low  | Low |
| Amiri M 2017 <sup>56</sup> | LDL-C    | Women with PCOS                            | COC (EE 30 mcg+ DSG 150 mcg) | Non-users   | 6 months  | 2 | 44    | MD | 14.68 (-1.25 to 30.61)  | 0.07 | VS | VS | NS | VS | NA       | Very low  | Low |
| Amiri M 2017 <sup>56</sup> | TG       | Women with PCOS                            | COC (EE 35 mcg + CPA 2 mg)   | Non-users   | 3 months  | 3 | 66    | MD | -4.13 (-13.00 to 4.75)  | 0.36 | VS | NS | NS | S  | 0.05/Yes | Very low  | Low |
| Amiri M 2017 <sup>56</sup> | TG       | Women with PCOS                            | COC (EE 35 mcg + CPA 2 mg)   | Non-users   | 6 months  | 2 | 55    | MD | 9.93 (-0.62 to 20.48)   | 0.07 | VS | NS | NS | VS | NA       | Very low  | Low |
| Amiri M 2017 <sup>56</sup> | TC       | Women with PCOS                            | COC (EE 35 mcg + CPA 2 mg)   | Non-users   | 3 months  | 4 | 76    | MD | 10.82 (-15.80 to 37.44) | 0.43 | VS | VS | NS | VS | 0.34/No  | Very low  | Low |
| Amiri M 2017 <sup>56</sup> | LDL-C    | Women with PCOS                            | COC (EE 35 mcg + CPA 2 mg)   | Non-users   | 3 months  | 4 | 76    | MD | 3.62 (-13.4 to 20.66)   | 0.68 | VS | VS | NS | VS | 0.13/No  | Very low  | Low |
| Amiri M 2017 <sup>56</sup> | LDL-C    | Women with PCOS                            | COC (EE 35 mcg + CPA 2 mg)   | Non-users   | 6 months  | 3 | 65    | MD | 3.41 (-22.80 to 29.50)  | 0.8- | VS | VS | NS | VS | 0.88/No  | Very low  | Low |
| Amiri M 2017 <sup>56</sup> | HDL-C    | Women with PCOS                            | COC (EE 30 mcg + CPA 2 mg)   | Non-users   | 3 months  | 4 | 76    | MD | 4.30 (-2.75 to 11.36)   | 0.23 | VS | VS | NS | S  | 0.01/Yes | Very low  | Low |
| Amiri M 2017 <sup>56</sup> | LDL-C    | Women with PCOS                            | COC (EE 30 mcg + DRSP 3 mg)  | Non-users   | 6 months  | 3 | 121   | MD | 0.82 (-7.47 to 9.11)    | 0.85 | VS | S  | NS | S  | 0.63/No  | Very low  | Low |
| Amiri M 2017 <sup>56</sup> | HDL-C    | Women with PCOS                            | COC (EE 30 mcg + DRSP 3 mg)  | Non-users   | 12 months | 2 | 79    | MD | 6.23 (-1.11 to 13.58)   | 0.10 | VS | VS | NS | S  | NA       | Very low  | Low |
| Ralph L 2015 <sup>62</sup> | HIV risk | Sub Saharan African women aged 16-50 years | COC                          | Non-HC user | 1-2 years | 4 | 12999 | HR | 0.90 (0.73-1.11)        | 0.32 | S  | NS | NS | NS | 0.55/No  | Mode rate | Low |
| Ralph L 2015 <sup>62</sup> | HIV risk | Sub Saharan African women aged 16-50 years | NET-EN (injection)           | Non-HC user | 1 year    | 2 | 6847  | HR | 1.19 (0.88-1.61)        | 0.27 | S  | NS | NS | S  | NA       | Low       | Low |

|                                |          |                                            |                             |           |             |   |      |    |                                      |      |    |    |    |    |         |          |      |
|--------------------------------|----------|--------------------------------------------|-----------------------------|-----------|-------------|---|------|----|--------------------------------------|------|----|----|----|----|---------|----------|------|
| Morrison CS 2015 <sup>63</sup> | HIV risk | Sub Saharan African women aged 16-50 years | DMPA                        | COC user  | 2-2.8 years | 3 | 3485 | HR | 1.23 (0.87-1.74)                     | 0.23 | S  | NS | NS | S  | 0.62/No | Low      | Low  |
| Amiri M 2007 <sup>56</sup>     | SBP      | Women at reproductive age with PCOS        | COC (EE 30 mcg + DRSP 3 mg) | Non-users | 6 months    | 2 | 116  | MD | 0.69 (-3.79 to 5.16) <sup>UA</sup>   | 0.76 | S  | S  | NS | S  | NA      | Very low | Low  |
| Amiri M 2007 <sup>56</sup>     | DBP      | Women at reproductive age with PCOS        | COC (EE 30 mcg + DRSP 3 mg) | Non-users | 6 months    | 2 | 116  | MD | -1.93 (-9.34 to 5.47) <sup>UA</sup>  | 0.61 | S  | VS | NS | S  | NA      | Very low | Low  |
| Amiri M 2007 <sup>56</sup>     | SBP      | Women at reproductive age with PCOS        | COC (EE 30 mcg + DRSP 3 mg) | Non-users | 12 months   | 2 | 116  | MD | -0.87 (-4.99 to 3.25) <sup>UA</sup>  | 0.68 | S  | NS | NS | S  | NA      | Low      | Low  |
| Amiri M 2007 <sup>56</sup>     | DBP      | Women at reproductive age with PCOS        | COC (EE 30 mcg + DRSP 3 mg) | Non-users | 12 months   | 2 | 116  | MD | -2.10 (-11.48 to 7.29) <sup>UA</sup> | 0.66 | S  | VS | NS | VS | NA      | Very low | Low  |
| Draper H 2006 <sup>58</sup>    | SBP      | Women at reproductive age                  | DMPA                        | NET-EN    | 1-2 years   | 2 | 1363 | MD | -2.31 (-8.79 to 4.16) <sup>NR</sup>  | 0.48 | NS | VS | NS | S  | NA      | Very low | High |
| Draper H 2006 <sup>58</sup>    | DBP      | Women at reproductive age                  | DMPA                        | NET-EN    | 1-2 years   | 2 | 1363 | MD | -0.57 (-1.81 to 0.66) <sup>NR</sup>  | 0.36 | NS | NS | NS | S  | NA      | Moderate | High |

Abbreviations: <sup>NR</sup> = adjusted or unadjusted effect size is not reported; <sup>UA</sup> = unadjusted effect size; AUC= Area under the curve; BMI = Body Mass Index; CI = Confidence interval; CPA = Cyproterone acetate; COC = Combined oral contraceptive; DBP = Diastolic blood pressure; DMPA = Depot medroxyprogesterone acetate; DRSP = Drospirenone; DSG = Desogestrel; EE = Ethinyl estradiol; ES = Effect size; FBG = Fasting blood glucose; HIV = Human immunodeficiency virus; HDL = High-density lipoprotein; HOMA-IR = Homeostatic Model Assessment for Insulin Resistance; HC = Hormonal contraceptive; HR = Hazard ratio; IUS =Intrauterine system; LDL-C = Low-density lipoprotein; LNG-IUS = Levonorgestrel-intrauterine system; MD = Mean difference; NA = Not available; NET-EN; Norethisterone enanthate; NS= Not serious; OR = odds ratio; PCOS = Polycystic ovarian syndrome; RR = Risk ratio; TC = Total cholesterol; S = Serious; SBP = Systolic blood pressure; VS = Very serious

**eTable 6.** Sensitivity Analyses of Meta-analysis of RCTs Initially Graded as High or Moderate

| Outcome                                           | Population                                                                  | Primary analysis |                                    |          | Sensitivity analysis: Excluding high ROB trials |                                         |       | Sensitivity analysis: excluding small size studies (25 <sup>th</sup> percentile) |             |       | Sensitivity analysis: HKSJ method (<5 studies) |                                |       |
|---------------------------------------------------|-----------------------------------------------------------------------------|------------------|------------------------------------|----------|-------------------------------------------------|-----------------------------------------|-------|----------------------------------------------------------------------------------|-------------|-------|------------------------------------------------|--------------------------------|-------|
|                                                   |                                                                             | No of studies    | ES (95% CI)                        | GRADE    | No of studies                                   | ES (95% CI)                             | GRADE | No of studies                                                                    | ES (95% CI) | GRADE | No of studies                                  | ES (95% CI)                    | GRADE |
| <sup>a</sup> Endometrial polyps                   | Post/Pre- + Post-menopausal women with adjuvant tamoxifen for breast cancer | 4                | OR: 0.22 (0.13-0.38) <sup>NR</sup> | High     | NA                                              | NA                                      | NA    | NA                                                                               | NA          | NA    | 4                                              | 0.22 (0.09-0.54) <sup>NR</sup> | High  |
| <sup>b</sup> <b>Sub group:</b> Endometrial polyps | Post - menopausal women with adjuvant tamoxifen for breast cancer           | 2                | OR: 0.30 (0.14-0.65) <sup>NR</sup> | High     | NA                                              | NA                                      | NA    | NA                                                                               | NA          | NA    | Not applicable for subgroup analysis           |                                |       |
| <sup>c</sup> FBG at 6-month                       | Women of reproductive age with PCOS                                         | 5                | MD: -2.05 (-2.82 to -1.28)         | Moderate | 3                                               | <sup>d</sup> MD: -3.03 (-4.92 to -1.14) | High  | NA                                                                               | NA          | NA    | NA                                             | NA                             | NA    |

a: RoB, Inconsistency, Imprecision & Indirectness: Not serious. Publication bias -- no (Egger's test: 0.731)  
b: RoB, Inconsistency, Imprecision & Indirectness: Not serious. Publication bias -- undetected.  
c: RoB: Serious; Inconsistency & Indirectness: Not serious; Imprecision: Not serious: Publication bias -- no (Egger's test: 0.221)  
d: RoB, Inconsistency, Imprecision & Indirectness: Not serious. Publication bias -- no (Egger's test: 0.948)

Note: <sup>NR</sup> = adjusted or unadjusted effect size is not reported; CI: Confidence interval; ES: Effect size; FBG; Fasting blood glucose; GRADE: Grading of Recommendation, Assessment, Development and Evaluations; HKSJ: Hartung-Knapp-Sidik-Jonkman; MD: Mean difference; NA: Not applicable; OR: Odds Ratio; PCOS: Polycystic ovarian syndrome; ROB: Risk of bias

**eTable 7.** Descriptive Characteristics of Included Meta-analyses of Cohort Studies

| Author; publication year             | Outcomes                  | No of studies | Total number of participants | Adjustment for confounding variables                                                                                                                                                                                                                                                                                                                                                                                                                                                                                                                                                                                                               |
|--------------------------------------|---------------------------|---------------|------------------------------|----------------------------------------------------------------------------------------------------------------------------------------------------------------------------------------------------------------------------------------------------------------------------------------------------------------------------------------------------------------------------------------------------------------------------------------------------------------------------------------------------------------------------------------------------------------------------------------------------------------------------------------------------|
| <b>Significant associations</b>      |                           |               |                              |                                                                                                                                                                                                                                                                                                                                                                                                                                                                                                                                                                                                                                                    |
| Moorman PG 2013 <sup>65</sup>        | Breast cancer             | 2             | NA                           | Age, parity, family cluster, history of oophorectomy before right censoring, age at menarche, breastfeeding, year of birth                                                                                                                                                                                                                                                                                                                                                                                                                                                                                                                         |
| Moorman PG 2013 <sup>65</sup>        | Breast cancer             | 2             | NA                           | Age, parity, family cluster, history of oophorectomy before right censoring, age at menarche, breastfeeding, year of birth                                                                                                                                                                                                                                                                                                                                                                                                                                                                                                                         |
| Moorman PG 2013 <sup>65</sup>        | Breast cancer             | 2             | NA                           | Age, age at first pregnancy, marital status, parity or number of pregnancies, age at menarche, breastfeeding, year of birth                                                                                                                                                                                                                                                                                                                                                                                                                                                                                                                        |
| Amiri M 2017 <sup>56</sup>           | BMI                       | 3             | 228                          | Not adjusted                                                                                                                                                                                                                                                                                                                                                                                                                                                                                                                                                                                                                                       |
| Asthana 2020 <sup>66</sup>           | Cervical cancer           | 5             | NA                           | Age, parity, BMI, marital status, level education, physical activity, smoking habit, OC use and duration, menopausal status with hormonal replacement therapy (HRT) use, social class, smoking, influence of age at first marriage, age at first-term pregnancy, ever diaphragm and condom use                                                                                                                                                                                                                                                                                                                                                     |
| Asthana 2020 <sup>66</sup>           | Cervical cancer           | 5             | NA                           | Age, parity, BMI, marital status, level education, physical activity, smoking habit, OC use and duration, menopausal status with HRT use, social class, smoking, influence of age at first marriage, age at first-term pregnancy, ever diaphragm and condom use                                                                                                                                                                                                                                                                                                                                                                                    |
| Asthana 2020 <sup>66</sup>           | Cervical cancer           | 4             | NA                           | Age, parity, BMI, marital status, level education, physical activity, smoking habit, OC use and duration, menopausal status with HRT use, social class, smoking                                                                                                                                                                                                                                                                                                                                                                                                                                                                                    |
| Delgado-Rodriguez 1992 <sup>67</sup> | Carcinoma in situ         | 5             | NA                           | Age, race, age at first intercourse, parity or number of pregnancies, socioeconomic status, marital status, age at first pregnancy, number of previous pap smears, history of sexually transmitted disease and tobacco use                                                                                                                                                                                                                                                                                                                                                                                                                         |
| Luan NN 2015 <sup>68</sup>           | Colorectal cancer adenoma | 8             | NA                           | Age, smoking status, diabetes, BMI, physical activity, alcohol use, menopausal status, pack years of smoking, education, parity, social class                                                                                                                                                                                                                                                                                                                                                                                                                                                                                                      |
| Bosetti C 2009 <sup>69</sup>         | Colorectal cancer adenoma | 6             | NA                           | Age, parity, smoking, social class, duration use of HRT, BMI, menopausal status, pack years of smoking, education, randomized treatment assignment, family history of colorectal cancer, previous history of benign colorectal polyps, physical activity, aspirin use, alcohol consumption, intake of red meat, multivitamin use, baseline postmenopausal hormone use, age at menarche, total energy intake, height, parity, total vitamin E intake, a total vitamin E by age interaction term and vitamin A supplement intake, randomized treatment assignment, family history of colorectal cancer, previous history of benign colorectal polyps |
| Bosetti C 2009 <sup>69</sup>         | Colorectal cancer adenoma | 6             | NA                           | Age, parity, smoking, social class, duration use of HRT, BMI, menopausal status, pack years of smoking, education, randomized treatment assignment, family history of colorectal cancer, previous history of benign colorectal polyps, physical activity, aspirin use, alcohol consumption, intake of red meat, multivitamin use, baseline postmenopausal hormone use, age at menarche                                                                                                                                                                                                                                                             |



|                               |                                                  |    |         |                                                                                                                                                                                                                                                                         |
|-------------------------------|--------------------------------------------------|----|---------|-------------------------------------------------------------------------------------------------------------------------------------------------------------------------------------------------------------------------------------------------------------------------|
| Xu J-L 2015 <sup>70</sup>     | Dry socket                                       | 16 | 2470    | Not adjusted                                                                                                                                                                                                                                                            |
| Vercellini 2011 <sup>71</sup> | Endometriosis                                    | 5  | NA      | Age, parity, adjusted for age (months), calendar time (2-year questionnaire period), and body mass index at age 18 years, race, family history of endometriosis, time to regular menstrual periods and length of menstrual cycle.                                       |
| Vercellini 2011 <sup>71</sup> | Endometriosis                                    | 5  | NA      | Age, parity, adjusted for age (months), calendar time (2-year questionnaire period), and body mass index at age 18 years, race, family history of endometriosis, time to regular menstrual periods and length of menstrual cycle                                        |
| Shere M 2015 <sup>72</sup>    | Plasma folate concentration                      | 12 | 2038    | Not reported                                                                                                                                                                                                                                                            |
| Shere M 2015 <sup>72</sup>    | RBC folate concentration                         | 9  | 956     | Not reported                                                                                                                                                                                                                                                            |
| Lan Y 2018 <sup>(68)</sup>    | Glioma risk                                      | 4  | NA      | Age, study center, randomization group, parity, age at menarche (<12, 13–14, >14), menopausal status, smoking status, alcohol intake, socioeconomic level, parity, age at first birth, OC use, education, BMI                                                           |
| Liu H 2017 <sup>74</sup>      | HTN (SBP $\geq$ 140mm Hg and DBP $\geq$ 90mm Hg) | 3  | 58324   | Age, BMI, smoking status, regular care, parity, alcohol intake, ethnicity, family history of hypertension, and physical activity                                                                                                                                        |
| Ortizo R 2017 <sup>75</sup>   | IBD                                              | 5  | 68382   | Age, social class, smoking, sex, calendar year, OA, RA, depression, anxiety, stress, asthma, chronic obstructive pulmonary disease, diabetes, irritable bowel syndrome and appendectomy                                                                                 |
| Ortizo R 2017 <sup>75</sup>   | Crohn's Disease                                  | 5  | 68382   | Age, social class, smoking, sex, calendar year, OA, RA, depression, anxiety, stress, asthma, chronic obstructive pulmonary disease, diabetes, irritable bowel syndrome and appendectomy                                                                                 |
| Wang X 2019 <sup>48</sup>     | Ulcerative colitis                               | 3  | 295484  | Age, social class, smoking, cohort, BMI, parity, age at menarche, HRT use and menopause status                                                                                                                                                                          |
| Liu H 2014 <sup>76</sup>      | Kidney cancer                                    | 4  | NA      | Age, age at first life birth, age at menarche, pack-years, BMI, menopausal status, education, study center, randomization group, parity, HRT use, smoking status, hypertension, alcohol intake, diuretic use, fruit intake, vegetable intake and race                   |
| Amiri M 2017 <sup>56</sup>    | Triglycerides                                    | 3  | 107     | Age and BMI                                                                                                                                                                                                                                                             |
| Amiri M 2017 <sup>56</sup>    | Triglycerides                                    | 2  | 45      | Age and BMI                                                                                                                                                                                                                                                             |
| Amiri M 2017 <sup>56</sup>    | Total cholesterol                                | 4  | 118     | Age and BMI                                                                                                                                                                                                                                                             |
| Halperin J 2011 <sup>77</sup> | Triglycerides                                    | 6  | 119     | Quality of studies, age, BMI and duration of study                                                                                                                                                                                                                      |
| Havrilesky 2013 <sup>78</sup> | Ovarian cancer                                   | 7  | NA      | Age, parity, menopausal status, HT, country, BMI, smoking, social class, height, age at first term pregnancy, age at first marriage, family history, breastfeeding, education, physical activity, other contraception methods, unilateral oophorectomy and hysterectomy |
| Havrilesky 2013 <sup>78</sup> | Ovarian cancer                                   | 5  | NA      | Age, parity, menopausal status, HT, country, BMI, smoking, social class, height, age at first term pregnancy, age at first marriage, unilateral oophorectomy and hysterectomy                                                                                           |
| Xu 2015 <sup>79</sup>         | Ischemic stroke                                  | 3  | 1083196 | Smoking, hypertension, diabetes, obesity, alcohol intake, lipid level                                                                                                                                                                                                   |

|                                     |                                                |    |        |                                                                                                                                                                                                                                                                                                                                                                                                                                                                                                                           |
|-------------------------------------|------------------------------------------------|----|--------|---------------------------------------------------------------------------------------------------------------------------------------------------------------------------------------------------------------------------------------------------------------------------------------------------------------------------------------------------------------------------------------------------------------------------------------------------------------------------------------------------------------------------|
| Johnston 1998 <sup>80</sup>         | Mortality due to subarachnoid hemorrhage (SAH) | 2  | 51144  | Race, smoking, socioeconomic status                                                                                                                                                                                                                                                                                                                                                                                                                                                                                       |
| Pérez-López FR 2020 <sup>81</sup>   | Suicide risk                                   | 3  | 167689 | Calendar time, age, BMI, smoking status, race, weight change, height, alcohol intake, physical activity, diet, SBP, use of antihypertensives drugs, history of diabetes, parenteral myocardial infarction, before age of 60 and time since menopause, parity, social class                                                                                                                                                                                                                                                |
| Baratloo A 2014 <sup>82</sup>       | VTE                                            | 3  | NA     | Current OCP user, calendar year, educational level, age, BMI, smoking, cancer, fractures, surgery, use of warfarin                                                                                                                                                                                                                                                                                                                                                                                                        |
| Bateson D 2016 <sup>83</sup>        | VTE                                            | 6  | NA     | Age, site, year of entry into study, diabetes, hypertension, hyperlipidemia, smoking, obesity, history of cancer, calendar year, length of schooling and education, duration of oral contraceptive use, smoking, ovarian stimulation drugs, recent surgery, EE dose, user type (current/new), BMI, insurance status, history of hormonal contraceptive use, history of use of other sexual hormones/modulators, history of pregnancy, childbirth & puerperium period, heart diseases, follow up examination after surgery |
| Martinez F 2012 <sup>84</sup>       | VTE                                            | 4  | 283719 | Age, calendar year, length of schooling and education, duration of oral contraceptive use, smoking, ovarian stimulation drugs, recent surgery, BMI, insurance status, history of hormonal contraceptive use, history of use of other sexual hormones/modulators, history of pregnancy, childbirth & puerperium period, heart diseases, follow up examination after surgery                                                                                                                                                |
| Dragoman MV 2018 <sup>85</sup>      | VTE                                            | 2  | NA     | Age, year and level of education, BMI and thrombophilia,                                                                                                                                                                                                                                                                                                                                                                                                                                                                  |
| Mantha S 2012 <sup>86</sup>         | VTE                                            | 3  | NA     | Age, duration of use, calendar year, length of schooling and education, length of oral contraceptive use, smoking, ovarian stimulation drugs, recent surgery                                                                                                                                                                                                                                                                                                                                                              |
| Oedingen C 2018 <sup>87</sup>       | VTE                                            | 3  | NA     | Smoking, BMI, age, duration of use, calendar year and education                                                                                                                                                                                                                                                                                                                                                                                                                                                           |
| Martinez F 2012 <sup>84</sup>       | VTE                                            | 8  | 503821 | Age, calendar year, length of schooling and education, length of oral contraceptive use, smoking, ovarian stimulation drugs, recent surgery                                                                                                                                                                                                                                                                                                                                                                               |
| Martinez F 2012 <sup>84</sup>       | VTE                                            | 5  | 340729 | Age, calendar year, length of schooling and education, duration of oral contraceptive use, smoking, ovarian stimulation drugs, recent surgery, BMI, insurance status, history of hormonal contraceptive use, history of use of other sexual hormones/modulators, history of pregnancy, childbirth & puerperium period, heart diseases, follow up examination after surgery                                                                                                                                                |
| Oedingen C 2018 <sup>87</sup>       | VTE                                            | 3  | 256815 | Age, calendar year, length of schooling and education, length of oral contraceptive use, smoking, ovarian stimulation drugs, recent surgery                                                                                                                                                                                                                                                                                                                                                                               |
| <b>Non-significant associations</b> |                                                |    |        |                                                                                                                                                                                                                                                                                                                                                                                                                                                                                                                           |
| Zhu H 2012 <sup>88</sup>            | Breast cancer                                  | 13 | NA     | Age, smoking, alcohol drinking, educational level, BMI, age at menarche, parity and family history of breast cancer, number of children, age at 1st pregnancy, duration of breastfeeding, smoking, exercise, obesity, energy consumption, geographical area, invitation to do breast screening, menopausal status, HRT use, BMI, alcohol consumption, age at first birth, history of benign breast disease, marital status, maternal history of breast cancer                                                             |
| Nindrea 2019 <sup>89</sup>          | Breast cancer                                  | 2  | 7440   | Age at recruitment, marital status, family history of cancer, breastfeeding history, genetic risk score, age at first live birth, age at menarche, family history, past breast biopsy, BMI                                                                                                                                                                                                                                                                                                                                |

|                                      |                                  |   |        |                                                                                                                                                                                                                                                                                                                                              |
|--------------------------------------|----------------------------------|---|--------|----------------------------------------------------------------------------------------------------------------------------------------------------------------------------------------------------------------------------------------------------------------------------------------------------------------------------------------------|
| Conz 2020 <sup>90</sup>              | Breast cancer                    | 2 | NA     | Age, education, endometriosis, parity, family history of premenopausal breast or ovarian cancer, age at the start of follow-up, female hormones in the form of oral contraceptives (OC), fertility drugs, or HT or prophylactic use of tamoxifen                                                                                             |
| Goshtasebi A <sup>91</sup>           | Peak spinal BMD accrual 12 month | 2 | 346    | Age, race, body weight, tobacco use, physical activity, baseline BMD, BMI, weight-bearing physical activity, calcium intake and self-reported menstruation regularity when not using OC/pregnant/nursing                                                                                                                                     |
| Goshtasebi A <sup>91</sup>           | Peak spinal BMD accrual 24 month | 3 | 462    | Age, race, height, body weight, tobacco use, 24-hour physical activity (kcal/d) baseline BMD, BMI, BMI change over 2 hours, weight-bearing physical activity, calcium intake, age at menarche, alcohol consumption, total calcium intake and self-reported menstruation regularity when not using OC/pregnant/nursing                        |
| Amiri M 2017 <sup>56</sup>           | BMI                              | 4 | 199    | NA                                                                                                                                                                                                                                                                                                                                           |
| Amiri M 2017 <sup>56</sup>           | BMI                              | 4 | 151    | NA                                                                                                                                                                                                                                                                                                                                           |
| Asthana 2020 <sup>66</sup>           | Cervical cancer                  | 4 | 91     | Age, height, age at first-term pregnancy, social class, smoking, parity, BMI, influence of age at first marriage, ever use of HRT, ever diaphragm use, ever condom use                                                                                                                                                                       |
| Delgado-Rodriguez 1992 <sup>67</sup> | Dysplasia                        | 4 | 248    | Age, race, age at first intercourse, parity or number of pregnancies, socioeconomic status, age at first pregnancy,                                                                                                                                                                                                                          |
| Delgado-Rodriguez 1992 <sup>67</sup> | Invasive cervical cancer         | 3 | NA     | Age, age at first pregnancy, marital status, parity or number of pregnancies                                                                                                                                                                                                                                                                 |
| Song J 2019 <sup>92</sup>            | Colorectal adenoma               | 4 | 742097 | Age, race, education, BMI, smoking, alcohol, anti-inflammatory drug use, history of previous colorectal endoscopy and mutually adjusted other reproductive factors, family history of colorectal cancer, aspirin, NSAIDs, physical activity, sitting watching TV/VCR, calcium, beef/pork/lamb as main dish, region, strenuous exercise       |
| Song J 2019 <sup>92</sup>            | Colorectal adenoma               | 2 | NA     | Age, race, education, BMI, smoking, alcohol, anti-inflammatory drug use, mutually adjusted other reproductive factors, age at endoscopy, previous history of endoscopy before 1980, family history of colorectal adenoma, physical activity, aspirin use, intake of alcohol, red meat, folate, methionine and use of postmenopausal hormones |
| Amiri M 2017 <sup>56</sup>           | FBG 3 months                     | 3 | 108    | Age and BMI                                                                                                                                                                                                                                                                                                                                  |
| Amiri M 2017 <sup>56</sup>           | FBG 6 months                     | 2 | 151    | Age and BMI                                                                                                                                                                                                                                                                                                                                  |
| Amiri M 2017 <sup>56</sup>           | FBG 6 months                     | 3 | 199    | Age and BMI                                                                                                                                                                                                                                                                                                                                  |
| Amiri M 2017 <sup>56</sup>           | Fasting insulin 3 months         | 2 | 158    | Age and BMI                                                                                                                                                                                                                                                                                                                                  |
| Amiri M 2017 <sup>56</sup>           | Fasting insulin 6 months         | 2 | 125    | Age and BMI                                                                                                                                                                                                                                                                                                                                  |
| Amiri M 2017 <sup>56</sup>           | HOMA-IR 3 months                 | 2 | 119    | Age and BMI                                                                                                                                                                                                                                                                                                                                  |
| Amiri M 2017 <sup>56</sup>           | HOMA-IR 6 months                 | 2 | 116    | Age and BMI                                                                                                                                                                                                                                                                                                                                  |
| Amiri M 2017 <sup>56</sup>           | HOMA-IR 6 months                 | 2 | 241    | Age and BMI                                                                                                                                                                                                                                                                                                                                  |

|                                      |                                         |   |      |                                                                                                                                                                                                                                                                         |
|--------------------------------------|-----------------------------------------|---|------|-------------------------------------------------------------------------------------------------------------------------------------------------------------------------------------------------------------------------------------------------------------------------|
| Morrison CS 2015 <sup>63</sup>       | HIV infection                           | 3 | 4513 | Age, married/living with partner, number of sex partners, condom use, region, education level, parity, workplace, duration of sex work, vaginal washing practices, number of sexual partners per week, incident genital tract infection                                 |
| Morrison CS 2015 <sup>63</sup>       | HIV infection                           | 2 | 3832 | Age, married/living with partner, number of sex partners, condom use, region, education level, parity, workplace, duration of sex work, vaginal washing practices, number of sexual partners per week, incident genital tract infection                                 |
| Morrison CS 2015 <sup>63</sup>       | HIV infection                           | 2 | 3757 | Age, married/living with partner, laboratory-confirmed infection, number of sex partners, condom use, region, education level, parity, workplace, duration of sex work, vaginal washing practices, number of sexual partners per week, incident genital tract infection |
| Amiri M 2017 <sup>56</sup>           | SBP 6 months                            | 2 | 57   | NA                                                                                                                                                                                                                                                                      |
| Amiri M 2017 <sup>56</sup>           | DBP 6 months                            | 2 | 57   | NA                                                                                                                                                                                                                                                                      |
| Liu H 2014 <sup>76</sup>             | Kidney cancer                           | 5 | 1581 | Age, BMI, waist to hip ratio, alcohol use, history of hypertension, pack-years, BMI, menopausal status, education, study center, randomization group, diuretic use, fruit intake, vegetable intake, race, smoking status                                                |
| Amiri M 2017 <sup>56</sup>           | Triglycerides                           | 2 | 19   | Age and BMI                                                                                                                                                                                                                                                             |
| Amiri M 2017 <sup>56</sup>           | Total cholesterol                       | 2 | 19   | Age and BMI                                                                                                                                                                                                                                                             |
| Amiri M 2017 <sup>56</sup>           | Total cholesterol                       | 2 | 45   | Age and BMI                                                                                                                                                                                                                                                             |
| Amiri M 2017 <sup>56</sup>           | LDL-Cholesterol                         | 3 | 107  | Age and BMI                                                                                                                                                                                                                                                             |
| Amiri M 2017 <sup>56</sup>           | LDL-Cholesterol                         | 2 | 19   | Age and BMI                                                                                                                                                                                                                                                             |
| Amiri M 2017 <sup>56</sup>           | LDL-Cholesterol                         | 2 | 45   | Age and BMI                                                                                                                                                                                                                                                             |
| Amiri M 2017 <sup>56</sup>           | HDL-Cholesterol                         | 3 | 107  | Age and BMI                                                                                                                                                                                                                                                             |
| Amiri M 2017 <sup>56</sup>           | HDL-Cholesterol                         | 2 | 19   | Age and BMI                                                                                                                                                                                                                                                             |
| Amiri M 2017 <sup>56</sup>           | HDL-Cholesterol                         | 2 | 45   | Age and BMI                                                                                                                                                                                                                                                             |
| Halperin J 2011 <sup>77</sup>        | HDL-Cholesterol                         | 9 | 269  | Quality of studies, age, BMI, estrogen dose                                                                                                                                                                                                                             |
| An N 2015 <sup>93</sup>              | Liver cancer                            | 3 | NA   | Age, alcohol, BMI, diabetes, race, smoking, social status, parent cohort study, menopausal status, education, parity, having had a tubal ligation                                                                                                                       |
| Stampfer 1990 <sup>94</sup>          | Non-fatal MI and fatal coronary disease | 3 | NA   | Age, parenteral history of infarction before age of 60, menopausal status, hormone use, time period, smoking status, hypertension, diabetes, high cholesterol, age, Quetelet index,                                                                                     |
| Peragallo Urrutia 2013 <sup>95</sup> | MI                                      | 2 | NA   | Age, parity, BMI, smoking, social class, education, alcohol intake, physical activity, history of hypertension, history of diabetes, menopausal status                                                                                                                  |
| Khader YS 2003 <sup>96</sup>         | MI                                      | 2 | NA   | Social class and smoking                                                                                                                                                                                                                                                |
| Khader YS 2003 <sup>96</sup>         | MI                                      | 2 | NA   | Social class and smoking                                                                                                                                                                                                                                                |

|                                     |                           |   |         |                                                                                                                                                                                                                                                                                                                                                                                                                                                                                                              |
|-------------------------------------|---------------------------|---|---------|--------------------------------------------------------------------------------------------------------------------------------------------------------------------------------------------------------------------------------------------------------------------------------------------------------------------------------------------------------------------------------------------------------------------------------------------------------------------------------------------------------------|
| Lagergreen K 2014 <sup>97</sup>     | Esophageal adenocarcinoma | 2 | 356116  | Age, study type, ethnicity, BMI, reflux, tobacco smoking, alcohol intake, education, BMI, physical activity and fruit vegetable intake, total energy and hysterectomy                                                                                                                                                                                                                                                                                                                                        |
| Havrilesky 2013 <sup>78</sup>       | Ovarian cancer            | 3 | NA      | Age, parity, menopausal status, HT, country, BMI, smoking, social class, height, age at first term pregnancy, age at first marriage, family history, age at menarche, breastfeeding, education, physical activity, other contraception methods                                                                                                                                                                                                                                                               |
| Qi S 2014 <sup>98</sup>             | Rheumatoid arthritis      | 5 | 332897  | Age, parity, smoking, social class, age, follow up cycle, age at menarche, time since menopause, BMI                                                                                                                                                                                                                                                                                                                                                                                                         |
| Chen Q 2014 <sup>99</sup>           | Rheumatoid arthritis      | 3 | NA      | Age, parity, cigarette smoking, weight, social class, follow up cycle, time since menopause, BMI, age at menarche                                                                                                                                                                                                                                                                                                                                                                                            |
| Chen Q 2014 <sup>99</sup>           | Rheumatoid arthritis      | 4 | NA      | Age, cigarette smoking, weight, parity, social class, follow up cycle, BMI                                                                                                                                                                                                                                                                                                                                                                                                                                   |
| Pladevall-Villa 1996 <sup>100</sup> | Rheumatoid arthritis      | 2 | NA      | Age, cigarette smoking, weight, follow up cycle, age at menarche, parity, time since menopause, BMI                                                                                                                                                                                                                                                                                                                                                                                                          |
| Xu 2018 <sup>101</sup>              | Hemorrhagic stroke        | 5 | 602620  | Smoking, hypertension, alcohol, socioeconomic status, race                                                                                                                                                                                                                                                                                                                                                                                                                                                   |
| Li F 2019 <sup>102</sup>            | Stroke                    | 7 | 1326249 | Age, educational level, calendar year, diabetes, hypertension, hyperlipidemia, arrhythmia, smoking, BMI, pack-years of smoking, physical activity, high blood pressure, Quetelet index                                                                                                                                                                                                                                                                                                                       |
| Wu L 2015 <sup>103</sup>            | Thyroid cancer            | 9 | 1291941 | Age, study center, parity, age at recruitment, duration, ethnicity, age at menarche, BMI, age at menopause, hormone therapy, physical activity, height, observational study/clinical trial (CT), alcohol intake, pack years of smoking, and history of goiter/nodules, randomization status in each CT, education, family history of thyroid cancer, marital status, number of live births, cumulative breast-feeding months and other contraceptive methods, alcohol consumption, time since last pregnancy |
| Dragoman MV 2018 <sup>85</sup>      | VTE risk                  | 2 | NA      | Age, year, level of education, fibroids, endometriosis, menstrual disorders, hypertension, hyperlipidemia, CVD, diabetes, asthma, back pain, recent emergency room visits and recent physician visits                                                                                                                                                                                                                                                                                                        |
| Dayan N 2011 <sup>104</sup>         | VTE risk                  | 2 | 235     | BMI, age, thrombophilia                                                                                                                                                                                                                                                                                                                                                                                                                                                                                      |
| De Bastos M 2014 <sup>105</sup>     | VTE risk                  | 3 | NA      | Age, year, level of education                                                                                                                                                                                                                                                                                                                                                                                                                                                                                |
| Glisic M 2018 <sup>106</sup>        | VTE risk                  | 3 | NA      | Age, thrombophilia, BMI, calendar year and education                                                                                                                                                                                                                                                                                                                                                                                                                                                         |
| Oedingen C 2018 <sup>87</sup>       | VTE risk                  | 3 | 277414  | Age, duration of use, calendar year, length of schooling and education, smoking, ovarian stimulation drugs, recent surgery                                                                                                                                                                                                                                                                                                                                                                                   |
| Oedingen C 2018 <sup>87</sup>       | VTE risk                  | 3 | 926752  | Age, calendar year, length of schooling and education, length of oral contraceptive use, smoking, ovarian stimulation drugs, recent surgery, complementary universal health insurance, medical risk factors, gynecological visit during previous year                                                                                                                                                                                                                                                        |

**eTable 8.** Nonsignificant Associations From Meta-analyses of Cohort Studies

| Source                               | Adverse health outcome  | Population                     | Exposed                 | Unexposed                  | Number of studies per association | Follow-up (range) | Metric | Random effect measure, ES (95% CI) | No of cases | P value | I <sup>2</sup> (%) | Largest study (95% CI) | PrI (95% CI)    | SSE  | 10% CCT (95% CI) | Amstar         |
|--------------------------------------|-------------------------|--------------------------------|-------------------------|----------------------------|-----------------------------------|-------------------|--------|------------------------------------|-------------|---------|--------------------|------------------------|-----------------|------|------------------|----------------|
| Zhu H 2012 <sup>84</sup>             | Breast cancer           | Pre- and post-menopausal women | Ever OC user            | Never user                 | 13                                | 5-28 years        | OR     | 1.08 (0.99-1.17)                   | 11424       | 0.10    | 61.4               | 1.06 (1.00-1.23)       | 0.82-1.41       | 0.77 | 0.96-1.10        | Critically low |
| Nindrea 2019 <sup>89</sup>           | Breast cancer           | Women of reproductive age      | Ever OC user (>5 years) | Never user                 | 2                                 | 1 cohort:11 years | OR     | 1.15 (0.61-2.15)                   | 145         | 0.67    | 54                 | 1.46 (0.98-2.18)       | NA              | NA   | 0.58-2.11        | Moderate       |
| Conz 2020 <sup>90</sup>              | Breast cancer           | Women aged <50 years           | LNG user                | Never user                 | 2                                 | 10-17 years       | OR     | 1.15 (0.98-1.34)                   | 7314        | 0.09    | 50.6               | 1.21 (1.11-1.32)       | NA              | NA   | 0.91-1.29        | High           |
| Goshtasebi A 2019 <sup>91</sup>      | Peak spinal BMD accrual | Women aged 12-19 years         | CHC user                | Never user                 | 2                                 | 12 months         | MD     | <sup>a</sup> -0.01 (-0.03 to 0.01) | NA          | 0.41    | 67.5               | 0 (-0.01 to 0.01)      | NA              | NA   | -0.03 to 0.01    | Moderate       |
| Goshtasebi A 2019 <sup>91</sup>      | Peak spinal BMD accrual | Women aged 12-19 years         | CHC user                | Never user                 | 3                                 | 24 months         | MD     | -0.02 (-0.04 to 0.00)              | NA          | 0.06    | 90.2               | -0.04 (-0.05 to -0.03) | -0.61 to 0.57   | 0.74 | -0.04 to 0.001   | Moderate       |
| Amiri M 2017 <sup>56</sup>           | BMI changes             | Women of reproductive age      | EE + CPA                | Never user                 | 4                                 | 3 months          | MD     | 0.61 (-0.96 to 2.17) <sup>UA</sup> | NA          | 0.45    | 0                  | 0.09 (-1.05 to 1.23)   | -40.53 to 15.75 | 0.42 | -0.74 to 0.91    | Critically low |
| Amiri M 2017 <sup>56</sup>           | BMI changes             | Women of reproductive age      | EA + CPA                | Never user                 | 4                                 | 6 months          | MD     | 0.01 (-2.19 to 2.21) <sup>UA</sup> | NA          | 0.99    | 0                  | 0.10 (-2.50 to 2.70)   | NA              | NA   | -2.19 to 2.21    | Critically low |
| Delgado-Rodriguez 1992 <sup>67</sup> | Dysplasia               | Women                          | Ever OC user            | Non hormonal contraceptive | 4                                 | 1-42 years        | OR     | 1.88 (0.98-3.60)                   | 91          | 0.06    | 51                 | 2.30 (0.80-7.10)       | 0.20-17.93      | 0.01 | 0.86-2.43        | Critically low |

|                                 |                          |                                  |                          |                                  |   |             |     |                      |       |      |      |                       |                 |      |               |                |
|---------------------------------|--------------------------|----------------------------------|--------------------------|----------------------------------|---|-------------|-----|----------------------|-------|------|------|-----------------------|-----------------|------|---------------|----------------|
|                                 |                          |                                  |                          | ve users                         |   |             |     |                      |       |      |      |                       |                 |      |               |                |
| Delgado-Rodriguez <sup>67</sup> | Carcinoma in situ        | Women                            | Ever OC user             | Non hormonal contraceptive users | 4 | 3-12 years  | OR  | 1.20 (0.94-1.55)     | 248   | 0.15 | 8.6  | 1.44 (1.03-2.02)      | 0.65-2.20       | 0.61 | 0.85-1.49     | Critically low |
| Delgado-Rodriguez <sup>67</sup> | Invasive cervical cancer | Women                            | Ever OC user             | Non hormonal contraceptive users | 3 | 6-20 years  | OR  | 4.09 (0.88-19.03)    | >20   | 0.07 | 45.4 | 1.80 (1.00-3.30)      | NA              | 0.07 | 0.92-5.10     | Critically low |
| Song J 2019 <sup>92</sup>       | CRC adenoma              | Women aged 30-74 years           | Ever OC user             | Never user                       | 4 | 14-24 years | OR  | 0.99 (0.89-1.10)     | >3000 | 0.79 | 72.3 | 0.93 (0.86-1.01)      | 0.62-1.56       | 0.74 | 0.89-1.07     | High           |
| Song J 2019 <sup>92</sup>       | CRC adenoma              | Women aged 30-55 years           | Ever OC user (> 5 years) | Never user                       | 2 | 14-22 years | OR  | 1.09 (0.97-1.22)     | 1341  | 0.15 | 0    | 1.10 (0.98-1.25)      | NA              | NA   | 0.95-1.24     | High           |
| Amiri M 2017 <sup>56</sup>      | FBG                      | Reproductive age women with PCOS | EE + CPA                 | Never user                       | 3 | 3 months    | WMD | 1.44 (-1.40 to 4.28) | NA    | 0.32 | 66   | 3.60 (1.47-3.53)      | -29.78 to 32.66 | 0.77 | -1.58 to 2.33 | Critically low |
| Amiri M 2017 <sup>56</sup>      | FBG                      | Reproductive age women with PCOS | EE + CPA                 | Never user                       | 2 | 6 months    | WMD | 0.34 (-5.40 to 6.09) | NA    | 0.91 | 0    | 0 (-7.83 to 7.83)     | NA              | NA   | -5.40 to 6.09 | Critically low |
| Amiri M 2017 <sup>56</sup>      | FBG                      | Reproductive age women with PCOS | EE + DRSP                | Never user                       | 3 | 6 months    | WMD | 0.28 (-5.91 to 6.47) | NA    | 0.93 | 69.7 | -4.50 (-9.10 to 0.10) | -171 to 171.56  | 0.54 | -5.28 to 5.78 | Critically low |
| Amiri M 2017 <sup>56</sup>      | Fasting insulin          | Reproductive age women with PCOS | EE + CPA                 | Never user                       | 2 | 3 months    | WMD | 0.39 (-1.81 to 2.58) | NA    | 0.73 | 0    | 0.55 (-2.06 to 3.16)  | NA              | NA   | -1.81 to 2.58 | Critically low |

|                                |                  |                                            |           |                                 |   |           |     |                       |     |      |      |                       |    |      |                |                |
|--------------------------------|------------------|--------------------------------------------|-----------|---------------------------------|---|-----------|-----|-----------------------|-----|------|------|-----------------------|----|------|----------------|----------------|
| Amiri M 2017 <sup>56</sup>     | Fasting insulin  | Reproductive age women with PCOS           | EE + CPA  | Never user                      | 2 | 6 months  | WMD | 0.75 (-3.44 to 1.95)  | NA  | 0.59 | 0    | 0.61 (-3.94 to 2.72)  | NA | NA   | -3.44 to 1.948 | Critically low |
| Amiri M 2017 <sup>56</sup>     | HOMA-IR 3 months | Reproductive age women with PCOS           | EE + CPA  | Never user                      | 2 | 3 months  | WMD | 0.09 (-0.44 to 0.62)  | NA  | 0.74 | 0    | 0.11 (-0.49 to 0.71)  | NA | NA   | -0.44 to 0.62  | Critically low |
| Amiri M 2017 <sup>56</sup>     | HOMA-IR 6 months | Reproductive age women with PCOS           | EE + CPA  | Never user                      | 2 | 6 months  | WMD | -0.15 (-0.74 to 0.43) | NA  | 0.60 | 0    | -0.10 (-0.83 to 0.63) | NA | NA   | -0.744 to 0.43 | Critically low |
| Amiri M 2017 <sup>56</sup>     | HOMA-IR 6 months | Reproductive age women with PCOS           | EE + DRSP | Never user                      | 2 | 6 months  | WMD | 0.14 (-0.88 to 1.16)  | NA  | 0.78 | 93.6 | 0.64 (0.43-0.85)      | NA | NA   | -0.96 to 1.06  | Critically low |
| Morrison CS 2015 <sup>63</sup> | HIV infection    | Sub-Saharan African women aged 15-49 years | DMPA user | Non-hormonal contraceptive user | 3 | 1-2 years | HR  | 1.44 (0.83-2.52)      | 355 | 0.20 | 70   | 1.22 (0.86-1.72)      | NA | 0.63 | 0.78-1.98      | Moderate       |
| Morrison CS 2015 <sup>63</sup> | HIV infection    | Sub-Saharan African women aged 15-49 years | COC user  | Non-hormonal contraceptive user | 2 | 1-2 years | HR  | 1.19 (0.82-1.72)      | 285 | 0.35 | 39.6 | 1.01 (0.70-1.45)      | NA | NA   | 0.82-1.73      | Moderate       |
| Morrison CS 2015 <sup>63</sup> | HIV infection    | Sub-Saharan African women aged 15-49 years | DMPA user | COC user                        | 2 | 1-2 years | HR  | 1.27 (0.97-1.66)      | 275 | 0.09 | 0    | 1.21 (0.87-1.67)      | NA | NA   | 0.96-1.67      | Moderate       |



|                            |               |                                     |                    |             |   |             |     |                                    |      |      |      |                        |                   |      |                 |                |
|----------------------------|---------------|-------------------------------------|--------------------|-------------|---|-------------|-----|------------------------------------|------|------|------|------------------------|-------------------|------|-----------------|----------------|
| Amiri M 2017 <sup>56</sup> | SBP 6 months  | Women of reproductive age with PCOS | CPA 2 mg/EE 35 mcg | Non-OC user | 2 | 6 months    | MD  | 1.67 (-3.06 to 6.39) <sup>UA</sup> | NA   | 0.49 | 0    | 2.00 (-3.01 to 7.01)   | NA                | NA   | -3.06 to 6.40   | Critically low |
| Amiri M 2017 <sup>56</sup> | DBP 6 months  | Women of reproductive age with PCOS | CPA 2 mg/EE 35 mcg | Non-OC user | 2 | 6 months    | MD  | 0.89 (-2.88 to 4.66) <sup>UA</sup> | NA   | 0.64 | 0    | 1.00 (-3.00 to 5.00)   | NA                | NA   | -2.88 to 4.66   | Low            |
| Liu H 2014 <sup>74</sup>   | Kidney cancer | Women of reproductive age           | Ever OC user       | Never user  | 5 | 12-28 years | SRR | 0.90 (0.81-1.01)                   | 1581 | 0.08 | 0    | 0.87 (0.75-1.02)       | 0.75-1.09         | 0.38 | 0.80-1.05       | Moderate       |
| Amiri M 2017 <sup>56</sup> | TG            | Reproductive age women with PCOS    | EE + CPA           | Never user  | 2 | 6 months    | WMD | 17.92 (-8.32 to 44.15)             | NA   | 0.18 | 32.4 | 26.57 (5.59-47.55)     | NA                | NA   | -16.82 to 41.87 | Critically low |
| Amiri M 2017 <sup>56</sup> | TC            | Reproductive age women with PCOS    | EE + CPA           | Never user  | 2 | 6 months    | WMD | 11.75 (-22.45 to 45.96)            | NA   | 0.50 | 74.2 | 27.07 (9.62-44.52)     | NA                | NA   | -24.47 to 40.56 | Critically low |
| Amiri M 2017 <sup>56</sup> | TC            | Reproductive age women with PCOS    | EE + DRSP          | Never user  | 2 | 6 months    | WMD | 31.19 (-18.11 to 80.49)            | NA   | 0.22 | 90.8 | 55.40 (39.25-71.55)    | NA                | NA   | -23.21 to 49.81 | Critically low |
| Amiri M 2017 <sup>56</sup> | LDL           | Reproductive age women with PCOS    | EE + CPA           | Never user  | 3 | 3 months    | WMD | 4.80 (-0.59 to 10.18)              | NA   | 0.08 | 0    | 2.05 (-5.64 to 9.74)   | -135.50 to 145.09 | 0.50 | -2.12 to 9.57   | Critically low |
| Amiri M 2017 <sup>56</sup> | LDL           | Reproductive age women with PCOS    | EE + CPA           | Never user  | 2 | 6 months    | WMD | 10.25 (-2.73 to 23.23)             | NA   | 0.12 | 0    | 11.61 (-3.40 to 26.62) | NA                | NA   | -2.73 to 23.23  | Critically low |

|                                      |                                         |                                  |                 |                     |   |                             |     |                         |     |      |      |                       |                   |      |                 |                |
|--------------------------------------|-----------------------------------------|----------------------------------|-----------------|---------------------|---|-----------------------------|-----|-------------------------|-----|------|------|-----------------------|-------------------|------|-----------------|----------------|
| Amiri M 2017 <sup>56</sup>           | LDL                                     | Reproductive age women with PCOS | EE + DRSP       | Never user          | 2 | 6 months                    | WMD | 13.75 (-21.93 to 49.43) | NA  | 0.45 | 87.8 | 30.70 (19.31-42.09)   | NA                | NA   | -27.36 to 40.06 | Critically low |
| Amiri M 2017 <sup>56</sup>           | HDL                                     | Reproductive age women with PCOS | EE + CPA        | Never user          | 3 | 3 months                    | WMD | 6.26 (-7.21 to 19.73)   | NA  | 0.36 | 96.5 | 10.31 (6.83-13.79)    | -374.80 to 387.30 | 0.41 | -12.45 to 20.58 | Critically low |
| Amiri M 2017 <sup>56</sup>           | HDL                                     | Reproductive age women with PCOS | EE + CPA        | Never user          | 2 | 6 months                    | WMD | 9.74 (-3.03 to 22.50)   | NA  | 0.14 | 79.3 | 15.47 (10.32-20.62)   | NA                | NA   | -5.12 to 14.13  | Critically low |
| Amiri M 2017 <sup>56</sup>           | HDL                                     | Reproductive age women with PCOS | EE + DRSP       | Never user          | 2 | 6 months                    | WMD | 11.61 (-3.87 to 27.09)  | NA  | 0.14 | 85.5 | 3.80 (-4.20 to 11.80) | NA                | NA   | -2.88 to 12.58  | Critically low |
| Halperin J 2011 <sup>77</sup>        | HDL                                     | Healthy women                    | OC user         | Never user          | 9 | 3-12 months                 | WMD | 0.36 (-0.13 to 0.85)    | NA  | 0.15 | 99.3 | 1.21 (1.41-1.28)      | -2.58 to 3.30     | 0.36 | -0.05 to 0.28   | Critically low |
| An N 2015 <sup>93</sup>              | Liver cancer                            | Women aged <30->70 years         | OC user         | Never OC user       | 3 | 11-36 years                 | RR  | 0.88 (0.64-1.22)        | 696 | 0.45 | 46.9 | 0.82 (0.60-1.13)      | 0.04-22.18        | 0.50 | 0.67-1.23       | Critically low |
| Stampfer 1990 <sup>94</sup>          | Non-fatal MI and fatal coronary disease | Female aged 25-79 years          | Past CHC user   | Non-users           | 3 | 8 years                     | RR  | 0.85 (0.69-1.05)        | 209 | 0.13 | 0    | 0.80 (0.60-1.00)      | 0.21-3.35         | 0.80 | 0.67-1.12       | Critically low |
| Peragallo Urrutia 2013 <sup>95</sup> | MI                                      | Female of reproductive age       | Current OC user | Non-concurrent user | 2 | 11-18 years                 | RR  | 0.97 (0.46-2.02)        | 106 | 0.93 | 41.4 | 0.70 (0.35-1.40)      | NA                | NA   | 0.46-2.02       | Critically low |
| Khader YS 2003 <sup>96</sup>         | MI                                      | Female aged 15-55 years          | Current OC user | Never user          | 2 | 1 study reported: 6.5 years | RR  | 1.45 (0.71-2.93)        | NA  | 0.93 | 15.9 | 1.80 (0.90-3.60)      | NA                | NA   | 0.65-2.91       | Critically low |

|                                     |                            |                           |                                       |                         |   |                             |    |                  |      |      |      |                  |            |      |            |                |
|-------------------------------------|----------------------------|---------------------------|---------------------------------------|-------------------------|---|-----------------------------|----|------------------|------|------|------|------------------|------------|------|------------|----------------|
| Khader YS 2003 <sup>96</sup>        | MI                         | Female aged 15-55 years   | Past OC user                          | Never user              | 2 | 1 study reported: 6.5 years | RR | 0.95 (0.66-1.36) | NA   | 0.76 | 0    | 1.00 (0.70-1.60) | NA         | NA   | 0.66-1.36  | Critically low |
| Lagergr een K 2014 <sup>97</sup>    | Oesophageal adenocarcinoma | Women aged 50-79 years    | OC user                               | Non-OC user             | 2 | 1-5 years                   | OR | 0.84 (0.55-1.31) | 88   | 0.45 | 0    | 0.88 (0.53-1.46) | NA         | NA   | 0.55-1.31  | Low            |
| Havrile sky 2013 <sup>78</sup>      | Ovarian cancer             | Women aged 25-71 years    | Ever OC user (<1 year use)            | Non-users               | 3 | 2-7.5 years                 | OR | 1.24 (0.90-1.70) | 477  | 0.19 | 14   | 1.36 (0.87-2.13) | 0.11-14.29 | 0.93 | 0.88-1.66  | Moderate       |
| Qi S 2014 <sup>98</sup>             | RA                         | Women aged 16-59 years    | OC user (past + current)              | Never user              | 5 | 1-26 years                  | RR | 1.03 (0.91-1.60) | 1285 | 0.69 | 0    | 1.10 (0.90-1.30) | 0.84-1.25  | 0.84 | 0.91-1.16  | Low            |
| Chen Q 2014 <sup>99</sup>           | RA                         | Women aged 16-55 years    | OC current user                       | Never user              | 3 | 1-20 years                  | RR | 0.96 (0.69-1.34) | 295  | 0.83 | 12.2 | 0.82 (0.59-1.15) | 0.07-12.91 | 0.54 | 0.69-1.34  | Critically low |
| Chen Q 2014 <sup>99</sup>           | RA                         | Women aged 16-55 years    | OC past user                          | Never user              | 4 | 1-20 years                  | RR | 0.93 (0.78-1.12) | 635  | 0.45 | 0    | 0.94 (0.72-1.22) | 0.63-1.38  | 0.73 | 0.78-1.12  | Critically low |
| Pladev all-Vila 1996 <sup>100</sup> | RA                         | Women aged 25-55 years    | OC user (longest duration)            | Never user              | 2 | 8-15 years                  | RR | 1.19 (0.65-2.16) | 140  | 0.57 | 66.2 | 0.90 (0.60-1.40) | NA         | NA   | 0.63-1.98  | Critically low |
| Xu 2018 <sup>101</sup>              | Hemorrhagic stroke         | Women aged 21-70 years    | Current OCP user                      | Non-current user        | 5 | 2.9-12.9 years              | OR | 1.10 (0.42-2.88) | 1730 | 0.84 | 85.4 | 0.36 (0.18-0.70) | 0.03-37.56 | 0.69 | 0.560-2.08 | Critically low |
| Li 2019 <sup>102</sup>              | Stroke                     | Women aged 15-19 years    | OCP duration (every 5-year increment) | Non-user                | 7 | 8.8-18.6 years              | OR | 1.19 (0.92-1.54) | 5529 | 0.19 | 88.5 | 1.99 (1.71-2.31) | 0.49-2.49  | 0.29 | 0.96-1.18  | Low            |
| Wu L 2015 <sup>103</sup>            | Thyroid cancer             | Women of reproductive age | Longest duration of OC                | Shortest duration of OC | 9 | 7.5-15.9 years              | RR | 0.85 (0.71-1.02) | 1479 | 0.08 | 26.1 | 0.66 (0.50-0.89) | 0.58-1.25  | 0.61 | 0.79-1.11  | Moderate       |

|                                 |     |                           |                              |                                 |   |                    |    |                     |       |      |      |                     |            |      |            |                |
|---------------------------------|-----|---------------------------|------------------------------|---------------------------------|---|--------------------|----|---------------------|-------|------|------|---------------------|------------|------|------------|----------------|
| Drago man MV 2018 <sup>85</sup> | VTE | Women of reproductive age | NRG user                     | LNG user                        | 2 | 1 cohort:7 years   | OR | 1.50 (0.93-1.43)    | 370   | 0.19 | 0    | 1.20 (0.90-1.60)    | NA         | NA   | 0.32-1.43  | High           |
| Dayan N 2011 <sup>104</sup>     | VTE | Women aged 13-44 years    | OCP users with thrombophilia | Non-users without thrombophilia | 2 | 1 cohort:33 months | OR | 11.05 (0.47-258.48) | 39    | 0.15 | 74.4 | 51.33 (6.79-388.35) | NA         | NA   | 0.34-30.79 | Low            |
| De Bastos M 2014 <sup>101</sup> | VTE | Women aged 12-50 years    | 1 <sup>st</sup> gen COC user | Non-User                        | 3 | 5-36 years         | OR | 1.45 (0.70-2.98)    | >1890 | 0.32 | 61.1 | 0.94 (0.44-1.98)    | NA         | 0.36 | 0.70-1.78  | High           |
| Glisic M 2017 <sup>106</sup>    | VTE | Women aged 15-53 years    | Oral POC                     | Non-user                        | 3 | 5-13 years         | OR | 0.81 (0.45-1.48)    | 1863  | 0.50 | 3.8  | 1.30 (0.50-3.00)    | 0.01-49.7  | 0.98 | 0.46-1.59  | High           |
| Oedingen C 2018 <sup>87</sup>   | VTE | Women aged 15-49 years    | DSG-COC/20E2                 | LNG-COC                         | 3 | 2-36 years         | OR | 1.06 (0.77-1.45)    | 2096  | 0.74 | 64   | 1.04 (0.86-1.25)    | 0.44-30.40 | 0.38 | 0.83-1.19  | Critically low |
| Oedingen C 2018 <sup>87</sup>   | VTE | Women aged 15-49 years    | GSD-COC/20E                  | LNG-COC                         | 3 | 2-8 years          | OR | 1.07 (0.89-1.29)    | 1805  | 0.47 | 49.9 | 1.05 (0.86-1.29)    | 0.16-7.29  | 0.96 | 0.88-1.21  | Critically low |

Abbreviations: <sup>NR</sup> = adjusted or unadjusted effect size is not reported; <sup>UA</sup> = unadjusted effect size; BMD = Bone mineral density; BMI = Body mass index; CCT = Credibility ceiling test; CE = Class of evidence; CHC = Combined hormonal contraceptive; CI = Confidence interval; COC = Combined oral contraceptive; CPA = Cyproterone acetate; DMPA = Depot medroxyprogesterone acetate; DRSP = Drospirenone; DSG = Desogestrel; EE = Ethinyl estradiol; ES = Effect size; ESB = Excess significance bias; FBG = Fasting blood glucose; GSD = Gestodene; HC = Hormonal contraceptive; HDL = High-density lipoprotein; HIV = Human immunodeficiency virus; HOMA-IR = Homeostatic Model Assessment for Insulin Resistance; HR = Hazard ratio; HTN = Hypertension; IBD = Inflammatory bowel disease; IUS = Intrauterine system; LDL-C = Low-density lipoprotein; LNG = Levonorgestrel; LNG-IUS = Levonorgestrel-intrauterine system; MD = Mean difference; MI = Myocardial infarction; NA = Not applicable; NP = Not pertinent; NRG = Norgestimate; OC = Oral contraceptive; OR = Odds ratio; PCOS = Polycystic ovarian syndrome; POC = Progesterone-only contraceptive; PrI = Prediction interval; RA = Rheumatoid arthritis; RR = Risk ratio; SAH = Subarachnoid hemorrhage; SRR = Summary risk ratio; SSE = Small study effect; TC = Total cholesterol; TG = Triglycerides; VTE = Venous thromboembolism; WMD = Weighted mean difference.

NA = not applicable because of non-significant effect estimate or the data is not available; NP = not pertinent, because estimated number is larger than observed, and there is no evidence of excess significance based on assumption made for plausible effect size

**eTable 9.** Sensitivity and Subgroup Analyses of Meta-analysis of Cohort Studies Initially Graded as Convincing or Highly Suggestive

| Outcome                                      | Population                                                       | Primary analysis |                      |          | Sensitivity analysis: Excluding low quality trials |                                   |          | Sensitivity analysis: excluding small size studies (25 <sup>th</sup> percentile) |             |    | Sensitivity analysis: HKSJ method (<5 studies) |                     |          |
|----------------------------------------------|------------------------------------------------------------------|------------------|----------------------|----------|----------------------------------------------------|-----------------------------------|----------|----------------------------------------------------------------------------------|-------------|----|------------------------------------------------|---------------------|----------|
|                                              |                                                                  | No of studies    | ES (95% CI)          | CE       | No of studies                                      | ES (95% CI)                       | CE       | No of studies                                                                    | ES (95% CI) | CE | No of studies                                  | ES (95% CI)         | CE       |
| <sup>a</sup> Endometriosis                   | Asymptomatic women/Women who undergone surgery for endometriosis | 5                | RR:1.60 (1.40-1.82)  | Class I  | NA                                                 | NA                                | NA       | NA                                                                               | NA          | NA | NA                                             | NA                  | NA       |
| <sup>b</sup> <b>Sub group:</b> Endometriosis | Asymptomatic women                                               | 3                | RR: 1.52 (1.09-2.12) | Class IV | NA                                                 | NA                                | NA       | NA                                                                               | NA          | NA | NA                                             | NA                  | NA       |
| <sup>c</sup> VTE risk                        | Women of reproductive age                                        | 6                | RR: 2.05 (1.59-2.64) | Class II | 2                                                  | <sup>d</sup> RR: 2.52 (1.89-3.37) | Class IV | NA                                                                               | NA          | NA | NA                                             | NA                  | NA       |
| <sup>e</sup> VTE risk                        | Women of reproductive age                                        | 3                | RR: 2.42 (1.76-3.32) | Class II | 3                                                  | RR: 2.42 (1.76-3.32)              | Class II | NA                                                                               | NA          | NA | 3                                              | RR:2.42 (1.26-4.68) | Class IV |

a: Inconsistency: <50%; No of cases: >1000; Largest study effect: Significant; PrI: Significant; P value:  $1.32 \times 10^{-12}$ ; ESB: Not significant; 10% CCT: Significant; Publication bias -- no (Egger's test: 0.338)

b: Inconsistency: <50%; No of cases: 213; Largest study effect: Not significant; PrI: Not significant; P value:  $4.94 \times 10^{-4}$ ; ESB: NP; 10% CCT: Not significant; Publication bias -- no (Egger's test: 0.997)

c: Inconsistency: >50%; No of cases: >1000; Largest study effect: Significant; PrI: Not significant; P value:  $2.66 \times 10^{-8}$ ; ESB: NA; 10% CCT: Significant; Publication bias -- yes (Egger's test: 0.019)

d: Inconsistency: >50%; No of cases: >1000; Largest study effect: Significant; PrI: NA; P value:  $3.10 \times 10^{-10}$ ; ESB: NA; 10% CCT: Not significant; Publication bias -- undetected

e: Inconsistency: >50%; No of cases: >1000; Largest study effect: Significant; PrI: Not significant; P value:  $4.54 \times 10^{-8}$ ; ESB: NA; 10% CCT: Significant; Publication bias -- no (Egger' test: 0.504)

Note: CCT: Credibility ceiling test; CE: Class of evidence; CI: Confidence interval; ES: Effect size; ESB: Excess significance bias; HKSJ: Hartung-Knapp-Sidik-Jonkman; NA: Not applicable; NP: Not pertinent; PrI: Prediction interval; RR: Risk ratio; VTE: Venous thromboembolism

**eFigure 1. PRISMA Flow Diagram**

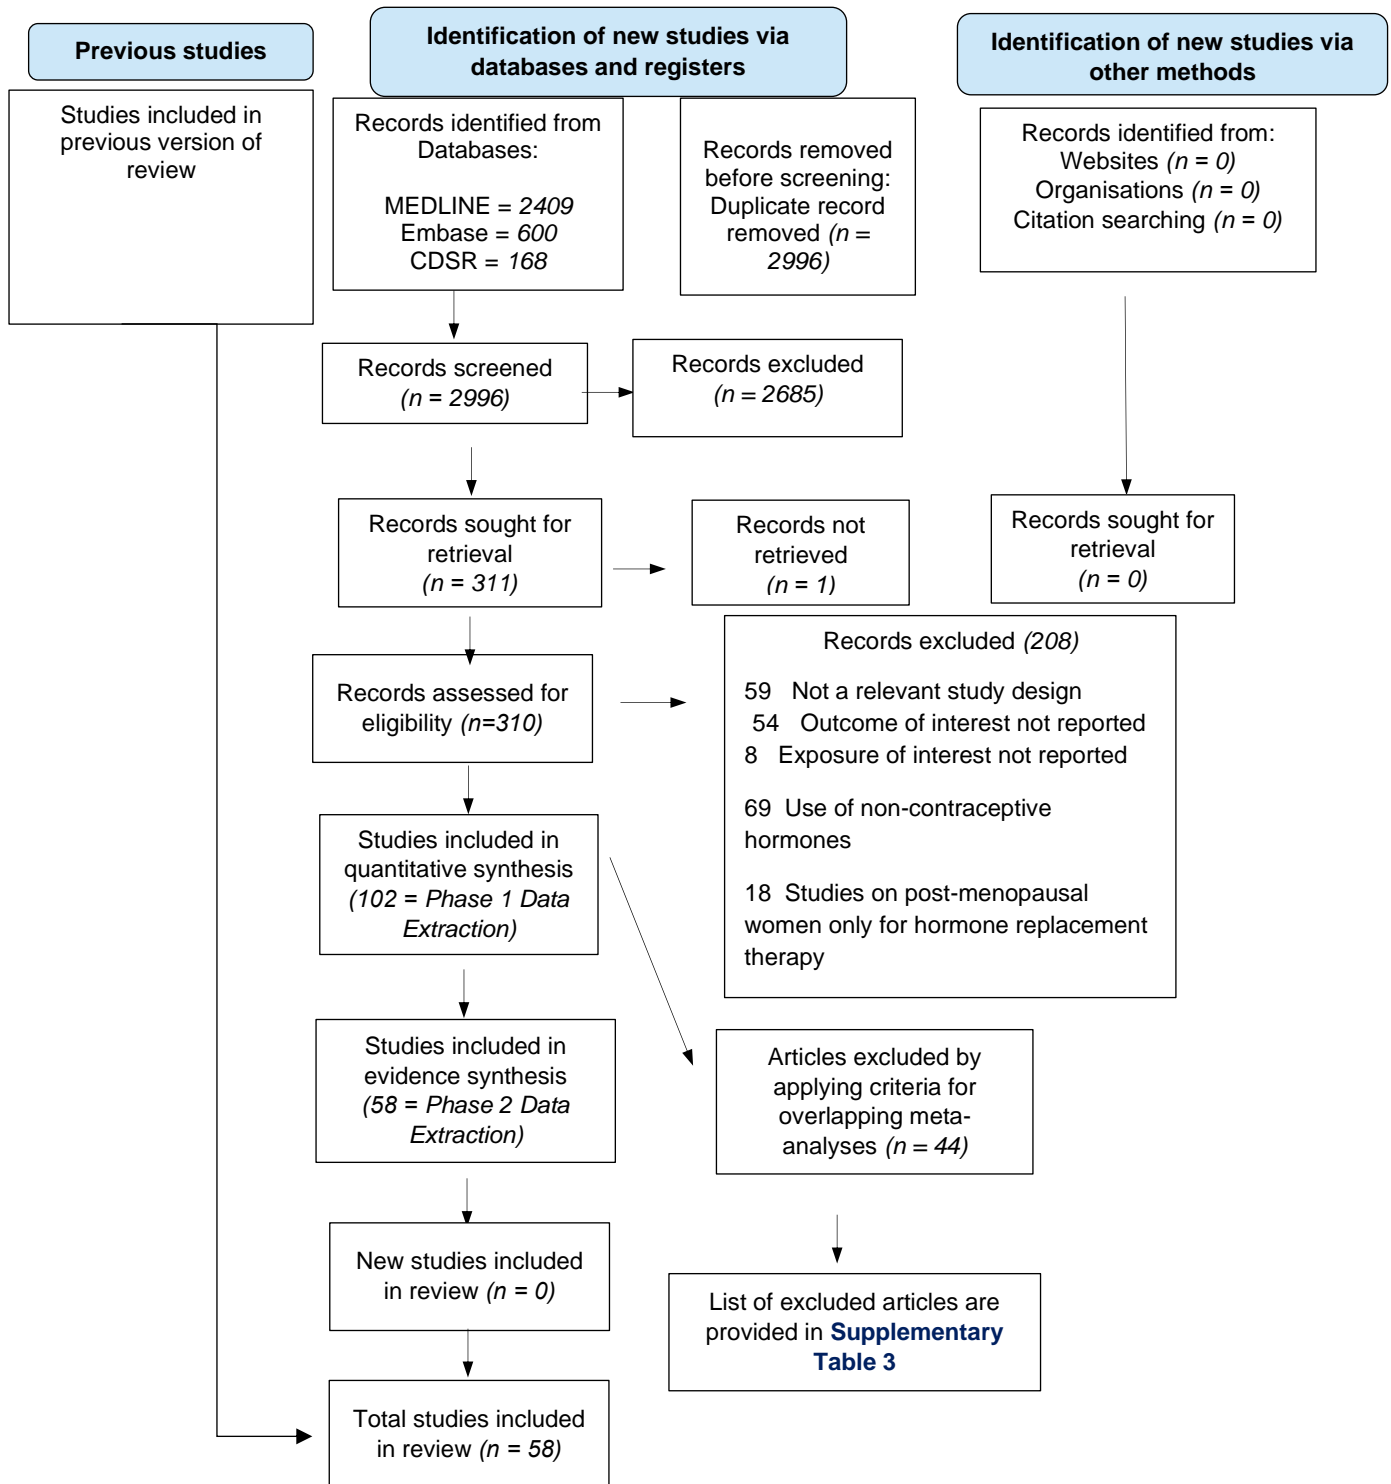

**eFigure 2.** Forest Plot of Association Between LNG-IUS and Risk of Endometrial Polyps

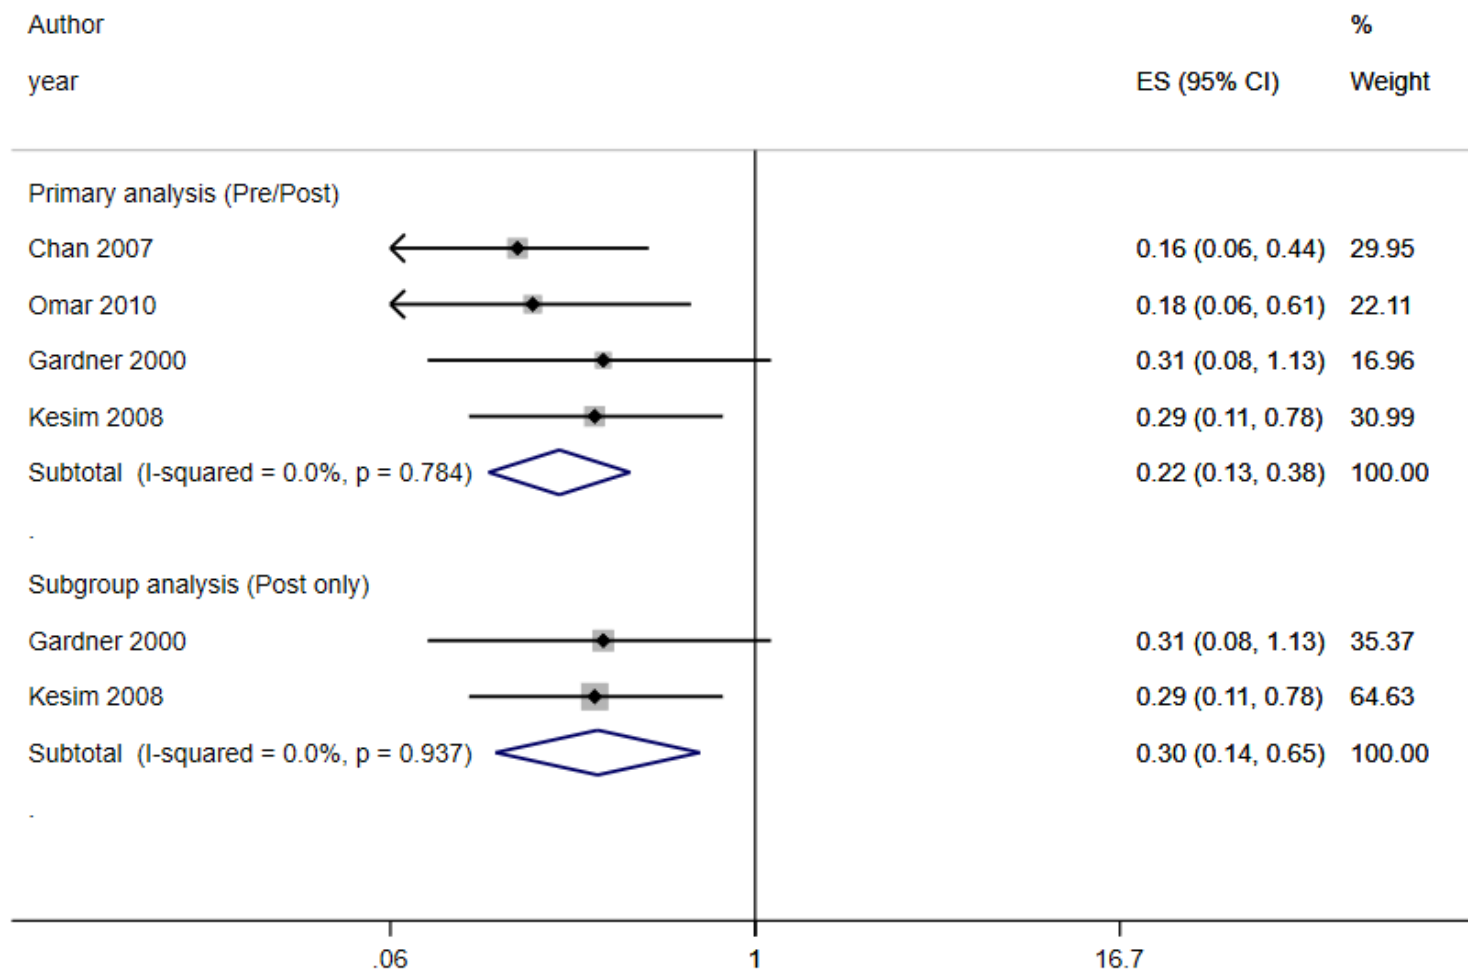

Abbreviations: CI = Confidence interval; ES = Effect size; LNG-IUS = Levonorgestrel-intrauterine system

Predictive interval for primary analysis: 0.07-0.73; for subgroup analysis: no predictive interval is generated due to <3 studies.

Note: The effect sizes reported are not stated as adjusted or unadjusted in their original meta-analyses' individual studies.



**eFigure 3.** Forest Plot of Association Between COC (EE, 30 mcg/CPA) and FBG Levels

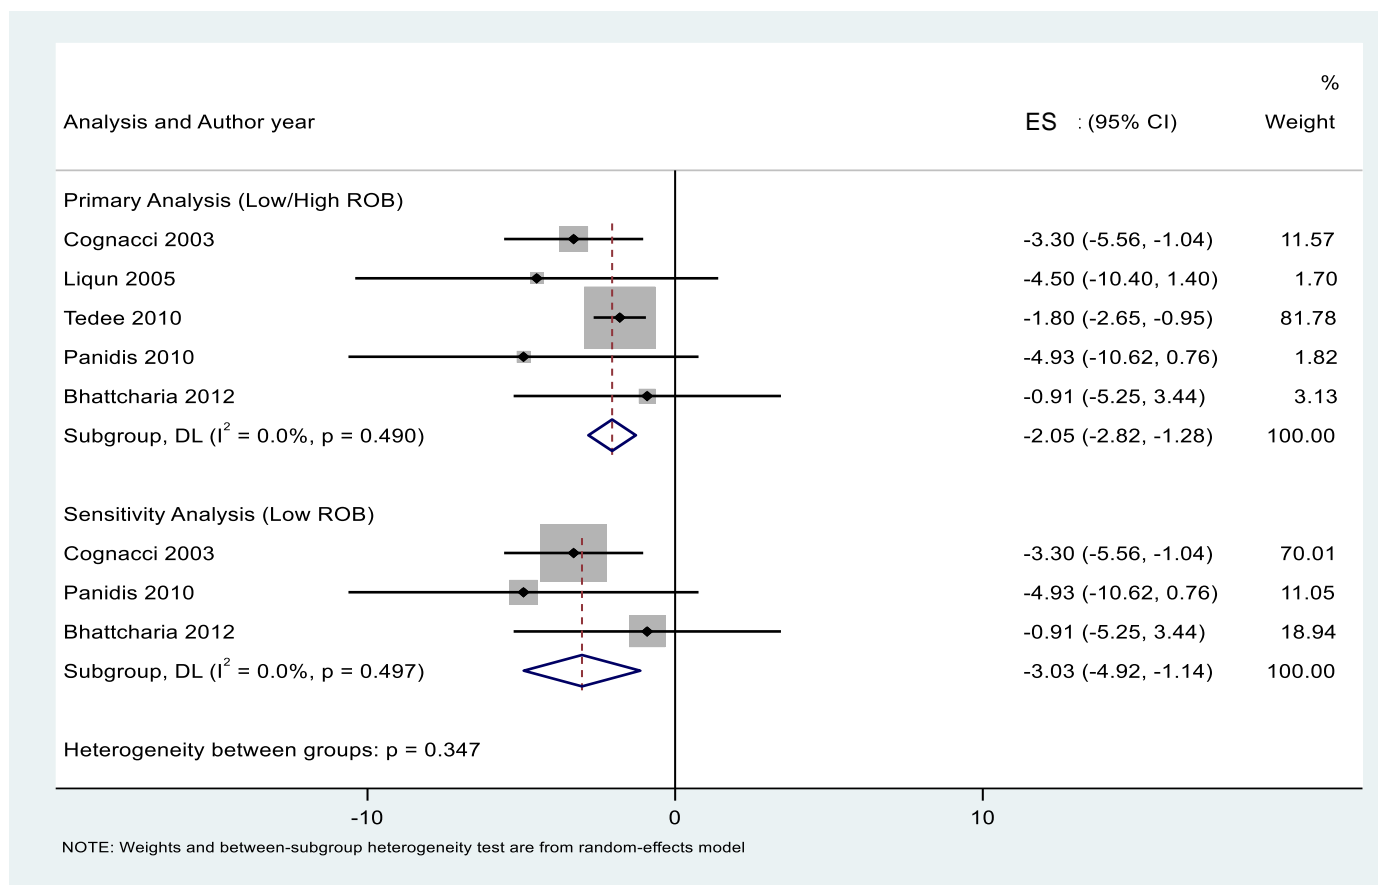

Abbreviations: CI = Confidence interval; CPA = Cyproterone acetate; COC = Combined oral contraceptive; ES = Effect size; FBG; Fasting blood glucose; ROB = Risk of bias

Predictive interval for primary analysis: -3.32 to -0.84

Predictive interval for sensitivity analysis: -15.29 to 9.23

Note: The effect sizes reported are not stated as adjusted or unadjusted in their original meta-analyses' individual studies.

**eFigure 4.** Forest Plot of Association Between Past Oral Contraceptive Users and Endometriosis Risk

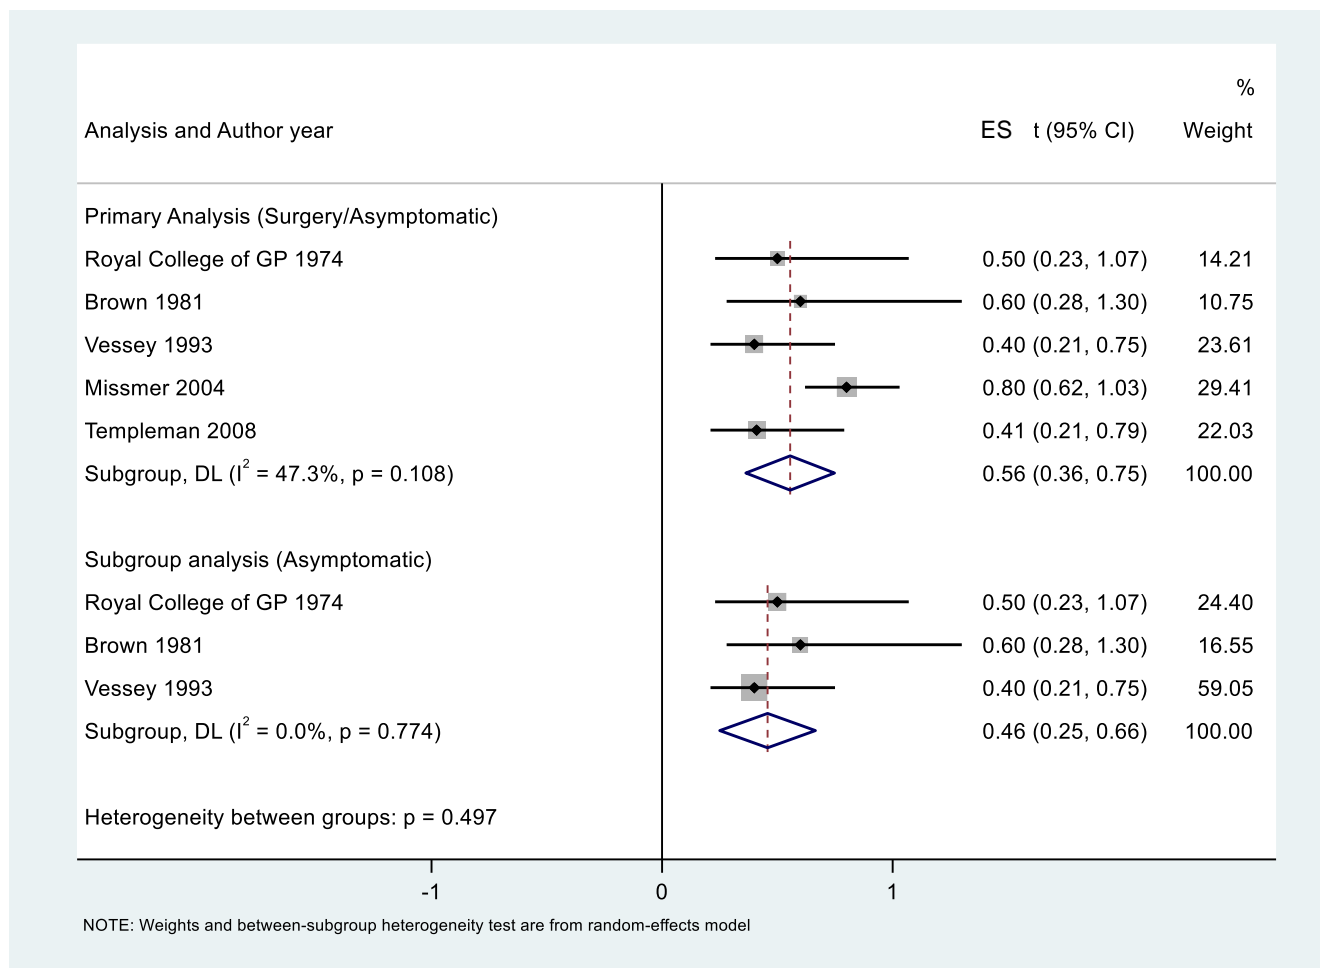

Abbreviations: CI = Confidence interval; ES = Effect size; OC = Oral contraceptive

Predictive interval for primary analysis: 0.21-1.51

Predictive interval for subgroup analysis: 0.03 -6.99

**eFigure 5.** Forest Plot of Association Between DSG-COC Low Dose and VTE Risk

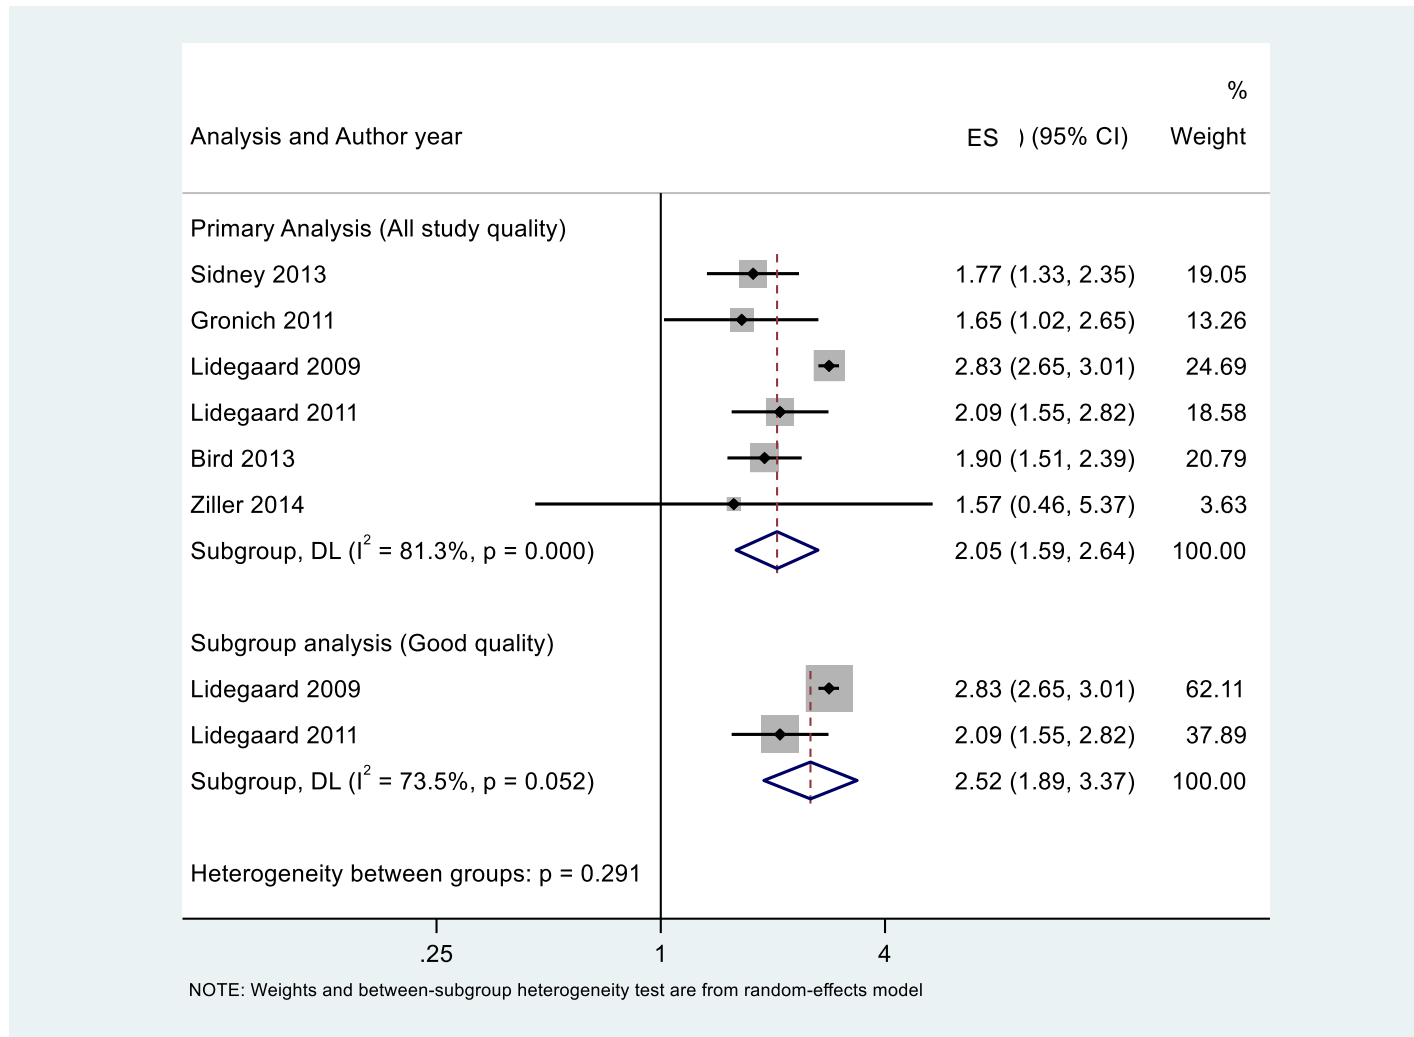

Abbreviations: CI = Confidence interval; COC = Combined oral contraceptive; DSG = Desogestrel; ES = Effect size; VTE = Venous thromboembolism

Predictive interval for primary analysis: 0.92-4.57; for subgroup analysis: no predictive interval is generated due to <3 studies.

**eFigure 6.** Schematic Network Diagram of Associations in RCTs (Binary Data)

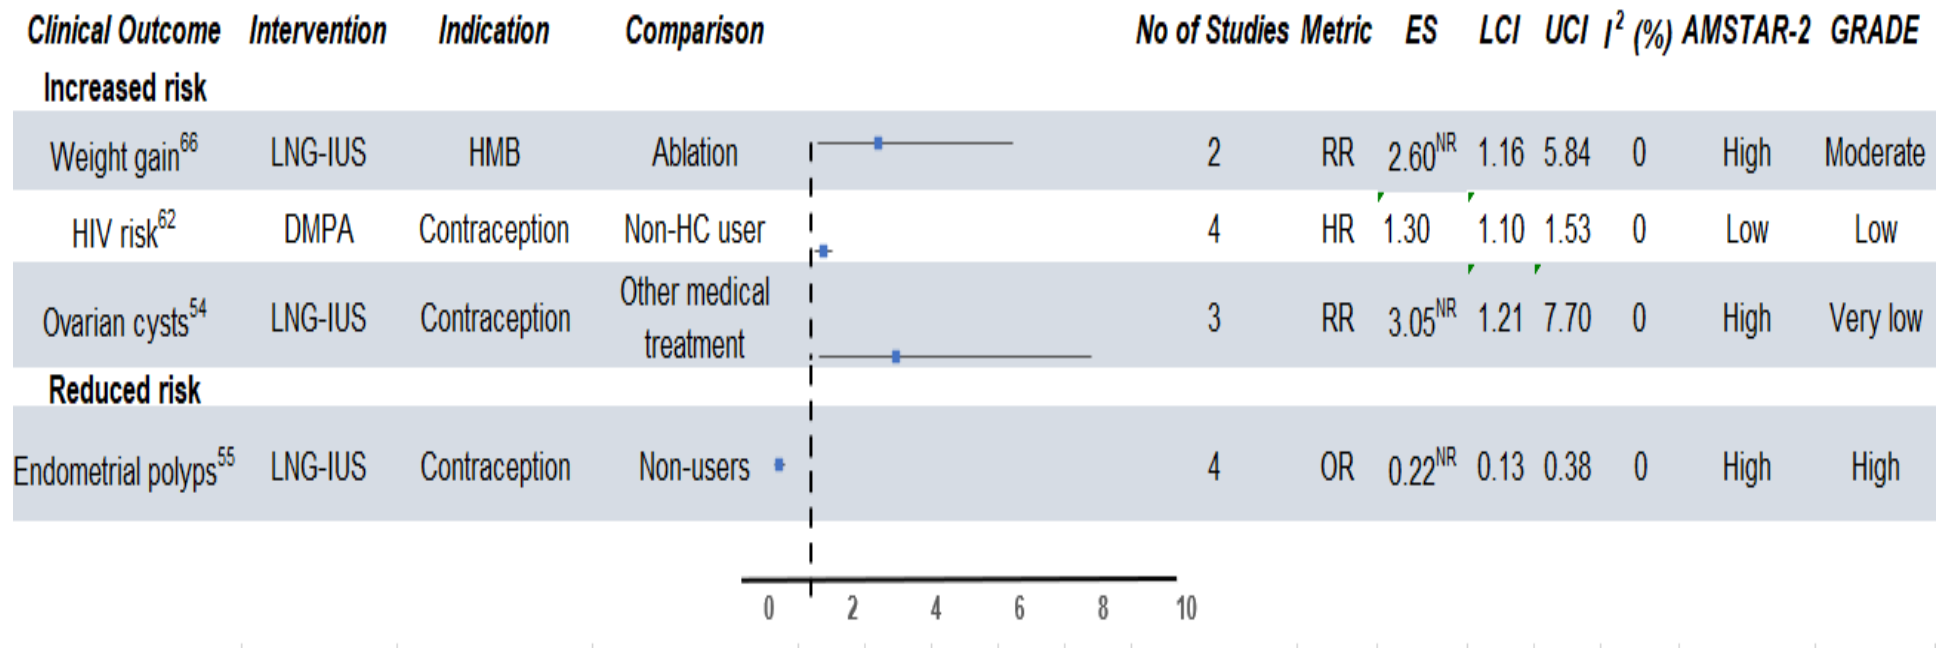

Abbreviations: <sup>NR</sup> = adjusted or unadjusted effect size is not reported; AMSTAR-2 = A Measurement Tool to Assess Systematic Review version 2; CI = Confidence interval; COC = Combined oral contraceptive; DMPA = Depot medroxyprogesterone acetate; ES = Effect size; GRADE = Grading of Recommendation, Assessment, Development and Evaluations; HC = Hormonal contraceptive; HIV = Human immunodeficiency virus; HMB = Heavy menstrual bleed; I<sup>2</sup> = heterogeneity; LCI = Lower confidence interval; LNG-IUS: Levonorgestrel-intrauterine system; UCI = Upper confidence interval

**eFigure 7.** Schematic Network Diagram of Associations Between COC Users vs Non-COC Users With PCOS in RCTs (Continuous Data)

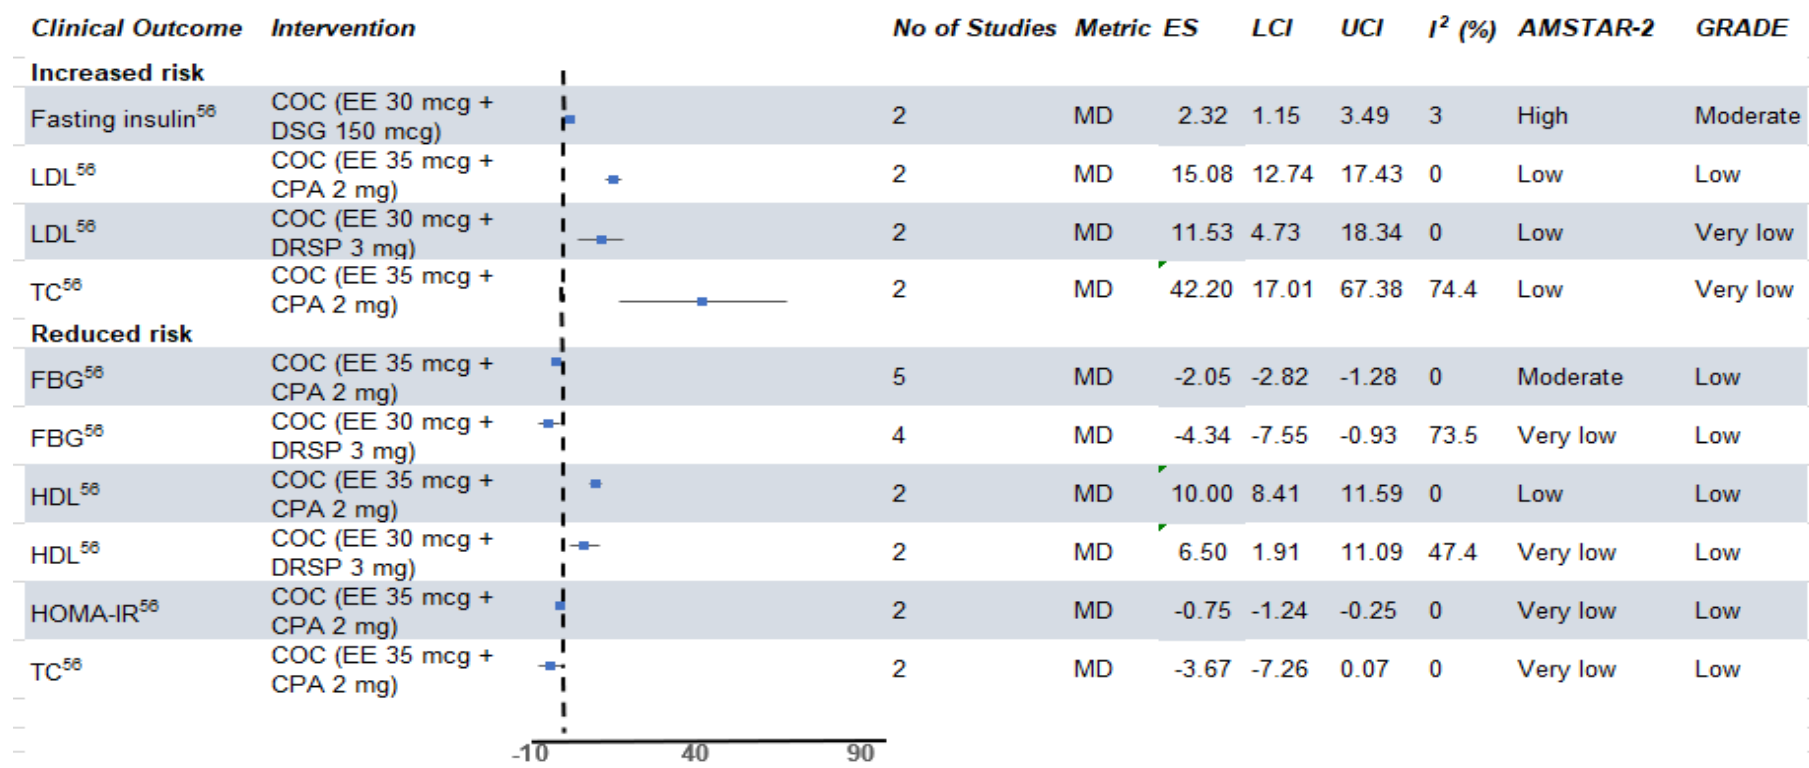

Abbreviations: AMSTAR-2 = A Measurement Tool to Assess Systematic Review version 2; CI = Confidence interval; COC = Combined oral contraceptive; CPA = Cyproterone acetate; DRSP = Drospirenone; DSG = Desogestrel; EE = Ethniyl estradiol; ES = Effect size; FBG = Fasting blood glucose; GRADE = Grading of Recommendation, Assessment, Development and Evaluations; HDL = High-density lipoprotein; HOMA-IR = Homeostatic Model Assessment for Insulin Resistance; I<sup>2</sup> = heterogeneity; LCI = Lower confidence interval; LDL-C = Low-density lipoprotein; LNG-IUS = Levonorgestrel-intrauterine system; MD = Mean difference; PCOS = Polycystic ovarian syndrome; TC = Total cholesterol; UCI = Upper confidence interval

**eFigure 8.** Schematic Network Diagram of Associations in Cohort Studies

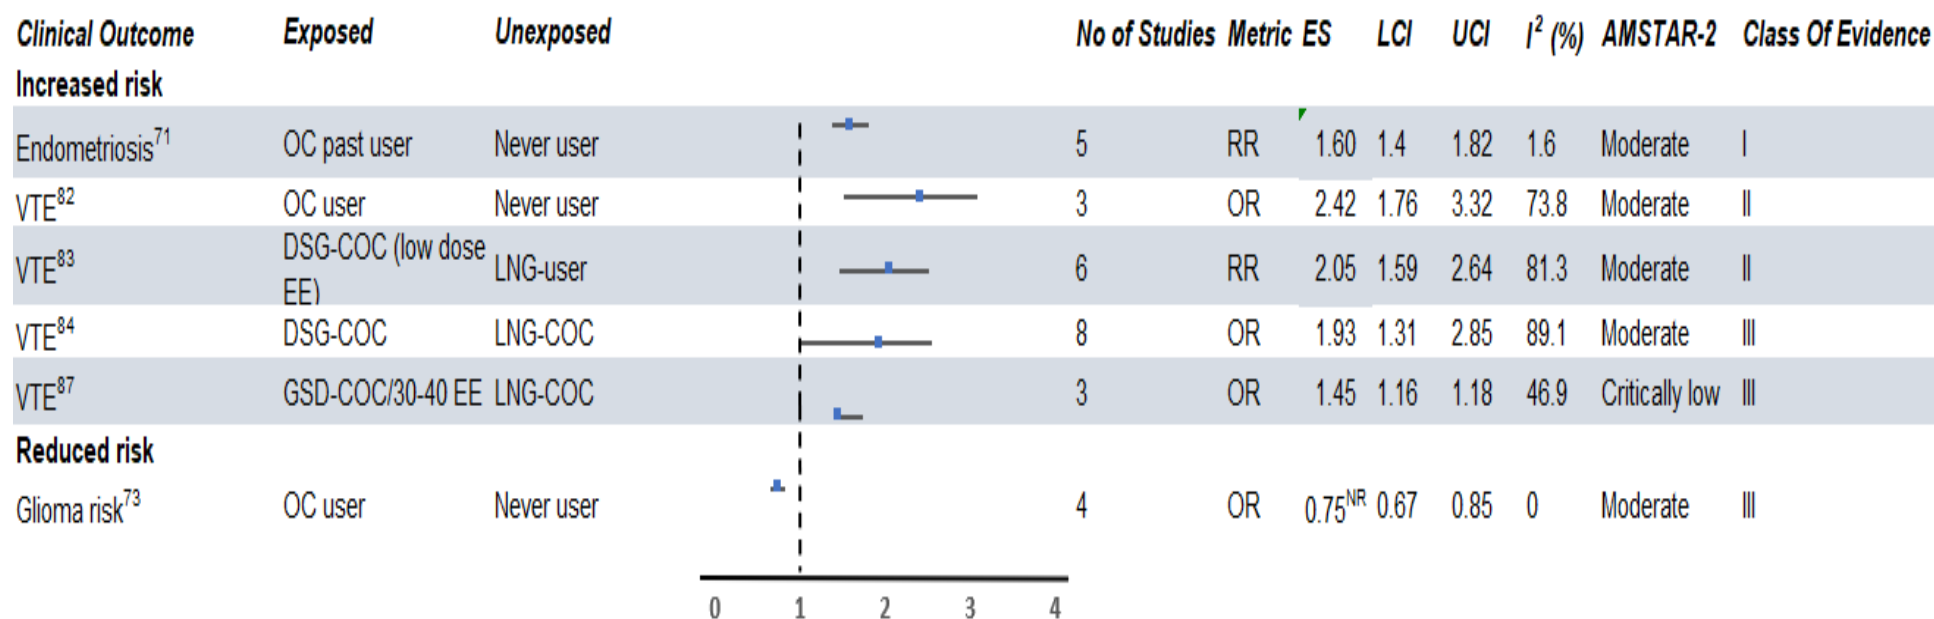

Abbreviations: <sup>NR</sup> = adjusted or unadjusted effect size is not reported; AMSTAR-2 = A Measurement Tool to Assess Systematic Review version 2; CI = Confidence interval; COC = Combined oral contraceptive; DRSP = Drospirenone; DSG = Desogestrel; EE = Ethniyl estradiol; ES = Effect size; GSD = Gestodene; LCI = Lower confidence interval; LNG = Levonorgestrel; OC = Oral contraceptive; OR = Odds ratio; RR = Risk ratio; UCI = Upper confidence interval; VTE = Venous thromboembolism

## References

1. Dragioti E, Solmi M, Favaro A, Fusar-Poli P, Dazzan P, Thompson T, et al. Association of Antidepressant Use With Adverse Health Outcomes: A Systematic Umbrella Review. *JAMA Psychiatry*. 2019 Dec 1;76(12):1241–55.
2. Neuenschwander M, Ballon A, Weber KS, Norat T, Aune D, Schwingshackl L, et al. Role of diet in type 2 diabetes incidence: umbrella review of meta-analyses of prospective observational studies. *BMJ*. 2019 Jul 3;366:l2368.
3. He Y, Li X, Gasevic D, Brunt E, McLachlan F, Millenson M, et al. Statins and Multiple Noncardiovascular Outcomes: Umbrella Review of Meta-analyses of Observational Studies and Randomized Controlled Trials. *Ann Intern Med*. 2018 Oct 16;169(8):543–53.
4. Hulot J-S, Collet J-P, Silvain J, Pena A, Bellemain-Appaix A, Barthélémy O, et al. Cardiovascular Risk in Clopidogrel-Treated Patients According to Cytochrome P450 2C19\*2 Loss-of-Function Allele or Proton Pump Inhibitor Coadministration: A Systematic Meta-Analysis. *J Am Coll Cardiol*. 2010 Jul 6;56(2):134–43.
5. Kwok CS, Loke YK. Meta-analysis: the effects of proton pump inhibitors on cardiovascular events and mortality in patients receiving clopidogrel. *Aliment Pharmacol Ther*. 2010;31(8):810–23.
6. Lin L, Cui B, Deng Y, Jiang X, Liu W, Sun C. The Efficacy of Proton Pump Inhibitor in Cirrhotics with Variceal Bleeding: A Systemic Review and Meta-Analysis. *Digestion*. 2021;102(2):117–27.
7. Ottawa Hospital Research Institute [Internet]. [cited 2021 Jan 13]. Available from: [http://www.ohri.ca/programs/clinical\\_epidemiology/oxford.asp](http://www.ohri.ca/programs/clinical_epidemiology/oxford.asp)
8. Shea BJ, Reeves BC, Wells G, Thuku M, Hamel C, Moran J, et al. AMSTAR 2: a critical appraisal tool for systematic reviews that include randomised or non-randomised studies of healthcare interventions, or both. *BMJ*. 2017 Sep 21;358:j4008.
9. Higgins JPT, Altman DG, Gøtzsche PC, Jüni P, Moher D, Oxman AD, et al. The Cochrane Collaboration's tool for assessing risk of bias in randomised trials. *BMJ*. 2011 Oct 18;343:d5928.
10. Lopez-Picado A, Lapuente O, Lete I. Efficacy and side-effects profile of the ethinylestradiol and etonogestrel contraceptive vaginal ring: a systematic review and meta-analysis. *Eur J Contracept Reprod Health Care Off J Eur Soc Contracept*. 2017;22(2):131–46.
11. Cortessis VK, Barrett M, Brown Wade N, Enebish T, Perrigo JL, Tobin J, et al. Intrauterine Device Use and Cervical Cancer Risk: A Systematic Review and Meta-analysis. *Obstet Gynecol*. 2017;130(6):1226–36.
12. Peng Y, Wang X, Feng H, Yan G. Is oral contraceptive use associated with an increased risk of cervical cancer? An evidence-based meta-analysis. *J Obstet Gynaecol Res*. 2017;43(5):913–22.
13. Wang S, Wang Y, Xu J, Chen Y. Is the oral contraceptive or hormone replacement therapy a risk factor for cholelithiasis: A systematic review and meta-analysis. *Medicine (Baltimore)*. 2017;96(14):e6556.

14. La Vecchia C, Ron E, Franceschi S, Dal Maso L, Mark SD, Chatenoud L, et al. A pooled analysis of case-control studies of thyroid cancer. III. Oral contraceptives, menopausal replacement therapy and other female hormones. *Cancer Causes Control CCC*. 1999;10(2):157–66.
15. Hawley W, Nuovo J, DeNeef CP, Carter P. Do oral contraceptive agents affect the risk of breast cancer? A meta-analysis of the case-control reports. *J Am Board Fam Pract*. 1993;6(2):123–35.
16. Mol BW, Ankum WM, Bossuyt PM, Van der Veen F. Contraception and the risk of ectopic pregnancy: a meta-analysis. *Contraception*. 1995;52(6):337–41.
17. Romieu I, Berlin JA, Colditz G. Oral contraceptives and breast cancer. Review and meta-analysis. *Cancer*. 1990;66(11):2253–63.
18. Romieu I, Hernandez-Avila M, Liang MH. Oral contraceptives and the risk of rheumatoid arthritis: a meta-analysis of a conflicting literature. *Br J Rheumatol*. 1989;28 Suppl 1(b1t, 8302415):13–23.
19. Koster T, Small RA, Rosendaal FR, Helmerhorst FM. Oral contraceptives and venous thromboembolism: a quantitative discussion of the uncertainties. *J Intern Med*. 1995;238(1):31–7.
20. Spector TD, Hochberg MC. The protective effect of the oral contraceptive pill on rheumatoid arthritis: an overview of the analytic epidemiological studies using meta-analysis. *J Clin Epidemiol*. 1990;43(11):1221–30.
21. Karagas MR, Stukel TA, Dykes J, Miglionico J, Greene MA, Carey M, et al. A pooled analysis of 10 case-control studies of melanoma and oral contraceptive use. *Br J Cancer*. 2002;86(7):1085–92.
22. Fernandez E, La Vecchia C, Balducci A, Chatenoud L, Franceschi S, Negri E. Oral contraceptives and colorectal cancer risk: a meta-analysis. *Br J Cancer*. 2001;84(5):722–7.
23. Hennessy S, Berlin JA, Kinman JL, Margolis DJ, Marcus SM, Strom BL. Risk of venous thromboembolism from oral contraceptives containing gestodene and desogestrel versus levonorgestrel: a meta-analysis and formal sensitivity analysis. *Contraception*. 2001;64(2):125–33.
24. Rushton L, Jones DR. Oral contraceptive use and breast cancer risk: a meta-analysis of variations with age at diagnosis, parity and total duration of oral contraceptive use. *Br J Obstet Gynaecol*. 1992;99(3):239–46.
25. Amoozegar F, Ronksley PE, Sauve R, Menon BK. Hormonal contraceptives and cerebral venous thrombosis risk: a systematic review and meta-analysis. *Front Neurol*. 2015;6(101546899):7.
26. Cibula D, Zikan M, Dusek L, Majek O. Oral contraceptives and risk of ovarian and breast cancers in BRCA mutation carriers: a meta-analysis. *Expert Rev Anticancer Ther*. 2011;11(8):1197–207.
27. Skegg DC, Noonan EA, Paul C, Spears GF, Meirik O, Thomas DB. Depot medroxyprogesterone acetate and breast cancer. A pooled analysis of the World Health Organization and New Zealand studies. *JAMA*. 1995;273(10):799–804.



28. Baillargeon J-P, McClish DK, Essah PA, Nestler JE. Association between the current use of low-dose oral contraceptives and cardiovascular arterial disease: a meta-analysis. *J Clin Endocrinol Metab*. 2005;90(7):3863–70.
29. Gallo MF, Grimes DA, Schulz KF, d’Arcangues C, Lopez LM. Combination injectable contraceptives for contraception. *Cochrane Database Syst Rev*. 2005;(3):CD004568.
30. Dentali F, Crowther M, Ageno W. Thrombophilic abnormalities, oral contraceptives, and risk of cerebral vein thrombosis: a meta-analysis. *Blood*. 2006;107(7):2766–73.
31. Kahlenborn C, Modugno F, Potter DM, Severs WB. Oral contraceptive use as a risk factor for premenopausal breast cancer: a meta-analysis. *Mayo Clin Proc*. 2006;81(10):1290–302.
32. Lopez LM, Kaptein AA, Helmerhorst FM. Oral contraceptives containing drospirenone for premenstrual syndrome. *Cochrane Database Syst Rev*. 2012;(2):CD006586.
33. Cornish JA, Tan E, Simillis C, Clark SK, Teare J, Tekkis PP. The risk of oral contraceptives in the etiology of inflammatory bowel disease: a meta-analysis. *Am J Gastroenterol*. 2008;103(9):2394–400.
34. Chakhtoura Z, Canonico M, Gompel A, Thalabard J-C, Scarabin P-Y, Plu-Bureau G. Progestogen-only contraceptives and the risk of stroke: a meta-analysis. *Stroke*. 2009;40(4):1059–62.
35. Iodice S, Barile M, Rotmensz N, Feroce I, Bonanni B, Radice P, et al. Oral contraceptive use and breast or ovarian cancer risk in BRCA1/2 carriers: a meta-analysis. *Eur J Cancer Oxf Engl 1990*. 2010;46(12):2275–84.
36. Chakhtoura Z, Canonico M, Gompel A, Scarabin P-Y, Plu-Bureau G. Progestogen-only contraceptives and the risk of acute myocardial infarction: a meta-analysis. *J Clin Endocrinol Metab*. 2011;96(4):1169–74.
37. Manzoli L, De Vito C, Marzuillo C, Boccia A, Villari P. Oral contraceptives and venous thromboembolism: a systematic review and meta-analysis. *Drug Saf*. 2012;35(3):191–205.
38. Lawrie TA, Helmerhorst FM, Maitra NK, Kulier R, Bloemenkamp K, Gulmezoglu AM. Types of progestogens in combined oral contraception: effectiveness and side-effects. *Cochrane Database Syst Rev*. 2011;(5):CD004861.
39. Stegeman BH, de Bastos M, Rosendaal FR, van Hylckama Vlieg A, Helmerhorst FM, Stijnen T, et al. Different combined oral contraceptives and the risk of venous thrombosis: systematic review and network meta-analysis. *BMJ*. 2013;347(8900488, bmj, 101090866):f5298.
40. Fu Y, Zhuang Z. Long-term effects of levonorgestrel-releasing intrauterine system on tamoxifen-treated breast cancer patients: a meta-analysis. *Int J Clin Exp Pathol*. 2014;7(10):6419–29.
41. Soroush A, Farshchian N, Komasi S, Izadi N, Amirifard N, Shahmohammadi A. The Role of Oral Contraceptive Pills on Increased Risk of Breast Cancer in Iranian Populations: A Meta-analysis. *J Cancer Prev*. 2016;21(4):294–301.

42. Li L, Zhong Y, Zhang H, Yu H, Huang Y, Li Z, et al. Association between oral contraceptive use as a risk factor and triple-negative breast cancer: A systematic review and meta-analysis. *Mol Clin Oncol*. 2017;7(1):76–80.
43. van Vlijmen EFW, Wiewel-Verschueren S, Monster TBM, Meijer K. Combined oral contraceptives, thrombophilia and the risk of venous thromboembolism: a systematic review and meta-analysis. *J Thromb Haemost JTH*. 2016;14(7):1393–403.
44. Ji L-W, Jing C-X, Zhuang S-L, Pan W-C, Hu X-P. Effect of age at first use of oral contraceptives on breast cancer risk: An updated meta-analysis. *Medicine (Baltimore)*. 2019;98(36):e15719.
45. Song SY, Park M, Lee GW, Lee KH, Chang HK, Kwak SM, et al. Efficacy of levonorgestrel releasing intrauterine system as a postoperative maintenance therapy of endometriosis: A meta-analysis. *Eur J Obstet Gynecol Reprod Biol*. 2018;231(e41, 0375672):85–92.
46. Roach REJ, Helmerhorst FM, Lijfering WM, Stijnen T, Algra A, Dekkers OM. Combined oral contraceptives: the risk of myocardial infarction and ischemic stroke. *Cochrane Database Syst Rev*. 2015;(8):CD011054.
47. Rojas-Villarraga A, Torres-Gonzalez J-V, Ruiz-Sternberg A-M. Safety of hormonal replacement therapy and oral contraceptives in systemic lupus erythematosus: a systematic review and meta-analysis. *PLoS One*. 2014;9(8):e104303.
48. Wang A, Mo T, Li Q, Shen C, Liu M. The effectiveness of metformin, oral contraceptives, and lifestyle modification in improving the metabolism of overweight women with polycystic ovary syndrome: a network meta-analysis. *Endocrine*. 2019;64(2):220–32.
49. Rojas Rojas F. Second- and third-generation oral contraceptives and myocardial infarction: Systematic review and meta-analysis. *Clin E Investig En Ginecol Obstet*. 2016;43(4):174–8.
50. Leelakanok N, Methaneethorn J. A Systematic Review and Meta-analysis of the Adverse Effects of Levonorgestrel Emergency Oral Contraceptive. *Clin Drug Investig*. 2020;40(5):395–420.
51. Friebel TM, Domchek SM, Rebbeck TR. Modifiers of cancer risk in BRCA1 and BRCA2 mutation carriers: systematic review and meta-analysis. *J Natl Cancer Inst*. 2014;106(6):dju091.
52. Zhong G-C, Cheng J-H, Xu X-L, Wang K. Meta-analysis of oral contraceptive use and risks of all-cause and cause-specific death. *Int J Gynaecol Obstet Off Organ Int Fed Gynaecol Obstet*. 2015;131(3):228–33.
53. Jing Z, Liang-Zhi X, Tai-Xiang W, Ying T, Yu-Jian J. The effects of Diane-35 and metformin in treatment of polycystic ovary syndrome: an updated systematic review. *Gynecol Endocrinol Off J Int Soc Gynecol Endocrinol*. 2008;24(10):590–600.
54. Lethaby A, Hussain M, Rishworth JR, Rees MC. Progesterone or progestogen-releasing intrauterine systems for heavy menstrual bleeding. *Cochrane Database Syst Rev*. 2015;(4):CD002126.

55. Chin J, Konje JC, Hickey M. Levonorgestrel intrauterine system for endometrial protection in women with breast cancer on adjuvant tamoxifen. *Cochrane Database Syst Rev*. 2009;(4):CD007245.
56. Amiri M, Ramezani Tehrani F, Nahidi F, Kabir A, Azizi F, Carmina E. Effects of oral contraceptives on metabolic profile in women with polycystic ovary syndrome: A meta-analysis comparing products containing cyproterone acetate with third generation progestins. *Metabolism*. 2017;73(mum, 0375267):22–35.
57. Lopez LM, Grimes DA, Gallo MF, Schulz KF. Skin patch and vaginal ring versus combined oral contraceptives for contraception. *Cochrane Database Syst Rev*. 2008;(1):CD003552.
58. Draper BH, Morroni C, Hoffman M, Smit J, Beksinska M, Hapgood J, et al. Depot medroxyprogesterone versus norethisterone oenanthate for long-acting progestogenic contraception. *Cochrane Database Syst Rev*. 2006;(3):CD005214.
59. Gallo MF, Nanda K, Grimes DA, Lopez LM, Schulz KF. 20 microg versus >20 microg estrogen combined oral contraceptives for contraception. *Cochrane Database Syst Rev*. 2008;(4):CD003989.
60. French R, Cowan F, Mansour D, Morris S, Hughes D, Robinson A, et al. Hormonally impregnated intrauterine systems (IUSs), versus other forms of reversible contraceptives as effective methods of preventing pregnancy. *Cochrane Database Syst Rev*. 2001;(2):CD001776.
61. Lopez LM, Grimes DA, Schulz KF. Steroidal contraceptives: effect on carbohydrate metabolism in women without diabetes mellitus. *Cochrane Database Syst Rev*. 2014;(4):CD006133.
62. Ralph LJ, McCoy SI, Shiu K, Padian NS. Hormonal contraceptive use and women's risk of HIV acquisition: a meta-analysis of observational studies. *Lancet Infect Dis*. 2015;15(2):181–9.
63. Morrison CS, Chen P-L, Kwok C, Baeten JM, Brown J, Crook AM, et al. Hormonal contraception and the risk of HIV acquisition: an individual participant data meta-analysis. *PLoS Med*. 2015;12(1):e1001778.
64. Gallo MF, Nanda K, Grimes DA, Lopez LM, Schulz KF. 20 micro g versus >20 micro g estrogen combined oral contraceptives for contraception. *Cochrane Database Syst Rev*. 2013;(8):CD003989.
65. Moorman PG, Havrilesky LJ, Gierisch JM, Coeytaux RR, Lowery WJ, Peragallo Urrutia R, et al. Oral contraceptives and risk of ovarian cancer and breast cancer among high-risk women: a systematic review and meta-analysis. *J Clin Oncol Off J Am Soc Clin Oncol*. 2013;31(33):4188–98.
66. Asthana S, Busa V, Labani S. Oral contraceptives use and risk of cervical cancer-A systematic review & meta-analysis. *Eur J Obstet Gynecol Reprod Biol*. 2020;247(e41, 0375672):163–75.
67. Delgado-Rodriguez M, Sillero-Arenas M, Martin-Moreno JM, Galvez-Vargas R. Oral contraceptives and cancer of the cervix uteri. A meta-analysis. *Acta Obstet Gynecol Scand*. 1992;71(5):368–76.

68. Luan N-N, Wu L, Gong T-T, Wang Y-L, Lin B, Wu Q-J. Nonlinear reduction in risk for colorectal cancer by oral contraceptive use: a meta-analysis of epidemiological studies. *Cancer Causes Control CCC*. 2015;26(1):65–78.
69. Bosetti C, Bravi F, Negri E, La Vecchia C. Oral contraceptives and colorectal cancer risk: a systematic review and meta-analysis. *Hum Reprod Update*. 2009;15(5):489–98.
70. Xu J-L, Sun L, Liu C, Sun Z-H, Min X, Xia R. Effect of oral contraceptive use on the incidence of dry socket in females following impacted mandibular third molar extraction: a meta-analysis. *Int J Oral Maxillofac Surg*. 2015;44(9):1160–5.
71. Vercellini P, Eskenazi B, Consonni D, Somigliana E, Parazzini F, Abbiati A, et al. Oral contraceptives and risk of endometriosis: a systematic review and meta-analysis. *Hum Reprod Update*. 2011;17(2):159–70.
72. Shere M, Bapat P, Nickel C, Kapur B, Koren G. Association Between Use of Oral Contraceptives and Folate Status: A Systematic Review and Meta-Analysis. *J Obstet Gynaecol Can JOGC J Obstet Gynecol Can JOGC*. 2015;37(5):430–8.
73. Lan Y-L, Wang X, Lou J-C, Ma B-B, Xing J-S, Zou S, et al. Update on the effect of exogenous hormone use on glioma risk in women: a meta-analysis of case-control and cohort studies. *J Neurooncol*. 2018;137(2):357–65.
74. Liu H, Yao J, Wang W, Zhang D. Association between duration of oral contraceptive use and risk of hypertension: A meta-analysis. *J Clin Hypertens Greenwich Conn*. 2017;19(10):1032–41.
75. Ortizo R, Lee SY, Nguyen ET, Jamal MM, Bechtold MM, Nguyen DL. Exposure to oral contraceptives increases the risk for development of inflammatory bowel disease: a meta-analysis of case-controlled and cohort studies. *Eur J Gastroenterol Hepatol*. 2017;29(9):1064–70.
76. Liu H., Wang X.-C., Hu G.-H., Huang T.-B., Xu Y.-F. Oral contraceptive use and kidney cancer risk among women: Evidence from a meta-analysis. *Int J Clin Exp Med*. 2014;7(11):3954–63.
77. Halperin IJ, Kumar SS, Stroup DF, Laredo SE. The association between the combined oral contraceptive pill and insulin resistance, dysglycemia and dyslipidemia in women with polycystic ovary syndrome: a systematic review and meta-analysis of observational studies. *Hum Reprod Oxf Engl*. 2011;26(1):191–201.
78. Havrilesky LJ, Moorman PG, Lowery WJ, Gierisch JM, Coeytaux RR, Urrutia RP, et al. Oral contraceptive pills as primary prevention for ovarian cancer: a systematic review and meta-analysis. *Obstet Gynecol*. 2013;122(1):139–47.
79. Xu Z, Li Y, Tang S, Huang X, Chen T. Current use of oral contraceptives and the risk of first-ever ischemic stroke: A meta-analysis of observational studies. *Thromb Res*. 2015;136(1):52–60.
80. Johnston SC, Colford JMJ, Gress DR. Oral contraceptives and the risk of subarachnoid hemorrhage: a meta-analysis. *Neurology*. 1998;51(2):411–8.

81. Perez-Lopez FR, Perez-Roncero GR, Lopez-Baena MT, Santabarbara J, Chedraui P. Hormonal contraceptives and the risk of suicide: a systematic review and meta-analysis. *Eur J Obstet Gynecol Reprod Biol.* 2020;251(e4I, 0375672):28–35.
82. Baratloo A, Safari S, Rouhipour A, Hashemi B, Rahmati F, Motamedi M, et al. The Risk of Venous Thromboembolism with Different Generation of Oral Contraceptives; a Systematic Review and Meta-Analysis. *Emerg Tehran Iran.* 2014;2(1):1–11.
83. Bateson D, Butcher BE, Donovan C, Farrell L, Kovacs G, Mezzini T, et al. Risk of venous thromboembolism in women taking the combined oral contraceptive: A systematic review and meta-analysis. *Aust Fam Physician.* 2016;45(1):59–64.
84. Martinez F, Ramirez I, Perez-Campos E, Latorre K, Lete I. Venous and pulmonary thromboembolism and combined hormonal contraceptives. Systematic review and meta-analysis. *Eur J Contracept Reprod Health Care Off J Eur Soc Contracept.* 2012;17(1):7–29.
85. Dragoman MV, Tepper NK, Fu R, Curtis KM, Chou R, Gaffield ME. A systematic review and meta-analysis of venous thrombosis risk among users of combined oral contraception. *Int J Gynaecol Obstet Off Organ Int Fed Gynaecol Obstet.* 2018;141(3):287–94.
86. Mantha S, Karp R, Raghavan V, Terrin N, Bauer KA, Zwicker JI. Assessing the risk of venous thromboembolic events in women taking progestin-only contraception: a meta-analysis. *BMJ.* 2012;345(8900488, bmj, 101090866):e4944.
87. Oedingen C, Scholz S, Razum O. Systematic review and meta-analysis of the association of combined oral contraceptives on the risk of venous thromboembolism: The role of the progestogen type and estrogen dose. *Thromb Res.* 2018;165(vrn, 0326377):68–78.
88. Zhu H, Lei X, Feng J, Wang Y. Oral contraceptive use and risk of breast cancer: a meta-analysis of prospective cohort studies. *Eur J Contracept Reprod Health Care Off J Eur Soc Contracept.* 2012;17(6):402–14.
89. Nindrea R.D., Anwar S.L., Harahap W.A., Lazuardi L., Dwiprahasto I., Aryandono T. Oral contraceptive used more than 5 years is associated with increased risk of breast cancer: A meta-analysis of 28,776 South east Asian women. *Syst Rev Pharm.* 2019;10(2):137–48.
90. Conz L, Mota BS, Bahamondes L, Teixeira Doria M, Francoise Mauricette Derchain S, Rieira R, et al. Levonorgestrel-releasing intrauterine system and breast cancer risk: A systematic review and meta-analysis. *Acta Obstet Gynecol Scand.* 2020;99(8):970–82.
91. Goshtasebi A, Subotic Brajic T, Scholes D, Beres Lederer Goldberg T, Berenson A, Prior JC. Adolescent use of combined hormonal contraception and peak bone mineral density accrual: A meta-analysis of international prospective controlled studies. *Clin Endocrinol (Oxf).* 2019;90(4):517–24.
92. Song J, Jin Z, Han H, Li M, Guo Y, Guo H, et al. Hormone replacement therapies, oral contraceptives, reproductive factors and colorectal adenoma risk: a systematic review and dose-response meta-analysis of observational studies. *Colorectal Dis Off J Assoc Coloproctology G B Irel.* 2019;21(7):748–59.

93. An N. Oral Contraceptives Use and Liver Cancer Risk: A Dose-Response Meta-Analysis of Observational Studies. *Medicine (Baltimore)*. 2015;94(43):e1619.
94. Stampfer MJ, Willett WC, Colditz GA, Speizer FE, Hennekens CH. Past use of oral contraceptives and cardiovascular disease: a meta-analysis in the context of the Nurses' Health Study. *Am J Obstet Gynecol*. 1990;163(1 Pt 2):285–91.
95. Peragallo Urrutia R, Coeytaux RR, McBroom AJ, Gierisch JM, Havrilesky LJ, Moorman PG, et al. Risk of acute thromboembolic events with oral contraceptive use: a systematic review and meta-analysis. *Obstet Gynecol*. 2013;122(2 Pt 1):380–9.
96. Khader YS, Rice J, John L, Abueita O. Oral contraceptives use and the risk of myocardial infarction: a meta-analysis. *Contraception*. 2003;68(1):11–7.
97. Lagergren K, Lagergren J, Brusselaers N. Hormone replacement therapy and oral contraceptives and risk of oesophageal adenocarcinoma: a systematic review and meta-analysis. *Int J Cancer*. 2014;135(9):2183–90.
98. Qi S, Xin R, Guo W, Liu Y. Meta-analysis of oral contraceptives and rheumatoid arthritis risk in women. *Ther Clin Risk Manag*. 2014;10(101253281):915–23.
99. Chen Q, Jin Z, Xiang C, Cai Q, Shi W, He J. Absence of protective effect of oral contraceptive use on the development of rheumatoid arthritis: a meta-analysis of observational studies. *Int J Rheum Dis*. 2014;17(7):725–37.
100. Pladevall-Vila M, Delclos GL, Varas C, Guyer H, Bruges-Tarradellas J, Anglada-Arisa A. Controversy of oral contraceptives and risk of rheumatoid arthritis: meta-analysis of conflicting studies and review of conflicting meta-analyses with special emphasis on analysis of heterogeneity. *Am J Epidemiol*. 1996;144(1):1–14.
101. Xu Z, Yue Y, Bai J, Shen C, Yang J, Huang X, et al. Association between oral contraceptives and risk of hemorrhagic stroke: a meta-analysis of observational studies. *Arch Gynecol Obstet*. 2018;297(5):1181–91.
102. Li F, Zhu L, Zhang J, He H, Qin Y, Cheng Y, et al. Oral Contraceptive Use and Increased Risk of Stroke: A Dose-Response Meta-Analysis of Observational Studies. *Front Neurol*. 2019;10(101546899):993.
103. Wu L, Zhu J. Linear reduction in thyroid cancer risk by oral contraceptive use: a dose-response meta-analysis of prospective cohort studies. *Hum Reprod Oxf Engl*. 2015;30(9):2234–40.
104. Dayan N, Holcroft CA, Tagalakis V. The risk of venous thrombosis, including cerebral vein thrombosis, among women with thrombophilia and oral contraceptive use: a meta-analysis. *Clin Appl Thromb Off J Int Acad Clin Appl Thromb*. 2011;17(6):E141-52.
105. de Bastos M, Stegeman BH, Rosendaal FR, Van Hylckama Vlieg A, Helmerhorst FM, Stijnen T, et al. Combined oral contraceptives: venous thrombosis. *Cochrane Database Syst Rev*. 2014;(3):CD010813.
106. Glisic M, Shahzad S, Tsoli S, Chadni M, Asllanaj E, Rojas LZ, et al. Association between progestin-only contraceptive use and cardiometabolic outcomes: A systematic review and meta-analysis. *Eur J Prev Cardiol*. 2018;25(10):1042–52.
